1 **PCH-2<sup>TRIP13</sup> regulates spindle checkpoint strength**

2

3 Lénaïg Défachelles, Anna E. Russo, Christian R. Nelson and Needhi Bhalla\*

4 Department of Molecular, Cell and Developmental Biology, University of California,

5 Santa Cruz,

6 Santa Cruz, CA 95064

7

8 \*corresponding author: nbhalla@ucsc.edu

9 Department of Molecular, Cell and Developmental Biology

10 225 Sinsheimer Labs

11 University of California, Santa Cruz

12 Santa Cruz, CA 95064

13 phone: (831) 459-1319

14 fax: (831) 459-3139

15

16 Key words: *C. elegans*, mitosis, embryo, spindle assembly checkpoint, Mad2,

17 aneuploidy, germline

18

19

20

21

22

23

24

25

26

27 **ABSTRACT**

28

29 Spindle checkpoint strength is dictated by the number of unattached kinetochores, cell  
30 volume and cell fate. We show that the conserved AAA-ATPase, PCH-2/TRIP13, which  
31 remodels the checkpoint effector Mad2 from an active conformation to an inactive one,  
32 controls checkpoint strength in *C. elegans*. When we manipulate embryos to decrease  
33 cell volume, PCH-2 is no longer required for the spindle checkpoint or recruitment of  
34 Mad2 at unattached kinetochores. This role is not limited to large cells: the stronger  
35 checkpoint in germline precursor cells also depends on PCH-2. PCH-2 is enriched in  
36 germline precursor cells and this enrichment relies on a conserved factor that induces  
37 asymmetry in the early embryo. Finally, the stronger checkpoint in germline precursor  
38 cells is regulated by CMT-1, the ortholog of p31comet, which is required for both PCH-  
39 2's localization to unattached kinetochores and its enrichment in germline precursor  
40 cells. Thus, PCH-2, likely by regulating the availability of inactive Mad2 at and near  
41 unattached kinetochores, governs checkpoint strength.

## 42 INTRODUCTION

43

44 To prevent the missegregation of chromosomes and the production of daughter cells  
45 with an incorrect number of chromosomes, the spindle checkpoint (also called the  
46 spindle assembly checkpoint) monitors whether chromosomes are attached to the  
47 spindle via kinetochores. If kinetochores fail to attach properly, this checkpoint delays  
48 the cell cycle to promote error correction and prevent aneuploidy. Despite its critical role,  
49 the duration of the cell cycle delay, defined as the strength of the spindle checkpoint, can  
50 be highly variable. This variability can be controlled by the number of unattached  
51 kinetochores (Collin et al., 2013), cell volume (Galli and Morgan, 2016; Kyogoku and  
52 Kitajima, 2017), and cell fate (Galli and Morgan, 2016; Gerhold et al., 2018).

53

54 The spindle checkpoint response initiates with the recruitment of Mad1 and Mad2 at  
55 unattached kinetochores (Chen et al., 1998; Chen et al., 1996; Li and Benezra, 1996;  
56 Sironi et al., 2001), which catalyzes the production of a Mitotic Checkpoint Complex  
57 (MCC). The MCC enforces a checkpoint arrest by inhibiting the Anaphase Promoting  
58 Complex/Cyclosome (APC/C) and preventing cell cycle progression (Sudakin et al.,  
59 2001). Formation of the MCC is driven by conformational changes in Mad2, which can  
60 exist in an open conformation (O-Mad2) or a closed conformation (C-Mad2) (Luo et al.,  
61 2002; Luo et al., 2004; Sironi et al., 2002). Mad2 is in the closed conformation in the  
62 Mad1/Mad2 tetramer recruited to unattached kinetochores. C-Mad2 in the tetramer acts  
63 as a template to convert additional soluble O-Mad2 to C-Mad2, which can be assembled  
64 into the MCC (De Antoni et al., 2005; Fava et al., 2011; Simonetta et al., 2009; Sironi et  
65 al., 2001). Thus, unattached kinetochores act as a platform for MCC assembly. The  
66 MCC effectively tunes the spindle checkpoint response: the length of the cell cycle delay  
67 imposed by the checkpoint is governed by the ratio of the soluble MCC checkpoint signal

68 to cytoplasmic volume (Collin et al., 2013; Dick and Gerlich, 2013; Galli and Morgan,  
69 2016; Kyogoku and Kitajima, 2017).

70

71 PCH-2/TRIP13 is a hexameric AAA+ ATPase that remodels HORMA domain-containing  
72 proteins, a group that includes Mad2 (Aravind and Koonin, 1998; Rosenberg and  
73 Corbett, 2015; Vader, 2015). Biochemical and structural studies have shown that PCH-2  
74 converts C-Mad2 to O-Mad2 (Alfieri et al., 2018; Brulotte et al., 2017; Ye et al., 2015).  
75 Originally described as a spindle checkpoint silencing protein, experiments showed that  
76 TRIP13 works with the adaptor protein p31<sup>comet</sup> to extract C-Mad2 from the MCC and  
77 promote its disassembly, permitting the activation of the APC/C (Alfieri et al., 2018;  
78 Brulotte et al., 2017; Eytan et al., 2014; Miniowitz-Shemtov et al., 2015; Wang et al.,  
79 2014; Ye et al., 2015). In addition, we and others have shown that PCH-2/TRIP13 is  
80 essential for spindle checkpoint activation in *C. elegans* and mammalian cells (Ma and  
81 Poon, 2016; Ma and Poon, 2018; Nelson et al., 2015; Yost et al., 2017). PCH-2 is  
82 present at unattached kinetochores (Nelson et al., 2015; Tipton et al., 2012; Wang et al.,  
83 2014) and is required to robustly localize Mad2, but not Mad1, to unattached  
84 kinetochores (Nelson et al., 2015; Yost et al., 2017).

85

86 Altogether, these data suggest that there is a significant population of C-Mad2 in cells  
87 that must be converted to O-Mad2 for a functional checkpoint. Indeed, in cells that have  
88 a significant population of available O-Mad2, such as HeLa cells (Luo et al., 2004),  
89 TRIP13 function becomes essential for checkpoint activity only when this population of  
90 O-Mad2 is limiting (Ma and Poon, 2018). However, these results raise another question:  
91 if one of PCH-2's/TRIP13's role is to make enough O-Mad2 available for checkpoint  
92 activation, why does PCH-2/TRIP13 localize to unattached kinetochores (Nelson et al.,  
93 2015; Tipton et al., 2012; Wang et al., 2014)? One possible answer comes from our

94 analysis of worms in which *cmt-1*, the *C. elegans* ortholog of p31<sup>comet</sup>, has been mutated.

95 In addition to its role as a PCH-2 adapter (Ye et al., 2015), CMT-1 is also required to  
96 localize PCH-2 to unattached kinetochores during the spindle checkpoint response,  
97 stabilize Mad2 protein levels and generate a robust spindle checkpoint response in AB  
98 cells (Nelson et al., 2015). Overexpressing Mad2 does not suppress the partial defect in  
99 spindle checkpoint activation in *cmt-1* mutants (Nelson et al., 2015), suggesting that  
100 PCH-2 localizes to unattached kinetochores to regulate spindle checkpoint strength.

101

102 Here, we test this possibility and show that PCH-2 controls spindle checkpoint strength  
103 in *C. elegans*. Despite being essential for the spindle checkpoint in the large somatic, or  
104 AB, cell of the two-cell embryo (Nelson et al., 2015), PCH-2 becomes dispensable for  
105 both the spindle checkpoint and Mad2 recruitment at unattached kinetochores as AB  
106 cells are genetically manipulated to become smaller. The requirement for PCH-2 in  
107 promoting spindle checkpoint strength is also observed in germline precursor, or P<sub>1</sub>,  
108 cells, which have a stronger checkpoint than their somatic counterparts. PCH-2 is  
109 enriched in P<sub>1</sub> cells and this enrichment depends on a conserved regulator of embryonic  
110 polarity, PAR-1. Further, the stronger checkpoint in P<sub>1</sub> cells also relies on the *C. elegans*  
111 ortholog of p31<sup>comet</sup>, CMT-1, indicating that CMT-1's ability to enrich PCH-2 in P<sub>1</sub> cells, in  
112 addition to its role in localizing PCH-2 to unattached kinetochores, contributes to a  
113 stronger checkpoint. We propose that PCH-2, and its mammalian ortholog TRIP13,  
114 ensure a robust spindle checkpoint response and proper chromosome segregation by  
115 regulating the availability of O-Mad2 at and near unattached kinetochores. This role may  
116 be specifically relevant in scenarios where maintaining genomic stability is particularly  
117 challenging, such as in oocytes and early embryos enlarged for developmental  
118 competence and germline cells that maintain immortality.

119

120 **RESULTS**

121

122 **PCH-2 becomes dispensable for the spindle checkpoint response in somatic cells**  
123 **experimentally reduced in size**

124 In the large somatic, or AB, cell of the *C. elegans* two-cell embryo, PCH-2 is essential for  
125 spindle checkpoint activation (Nelson et al., 2015). To further assess the requirements  
126 for PCH-2 function, we manipulated the cell volume of AB cells experimentally by  
127 performing RNA interference (RNAi) against *ani-2*. *ani-2* encodes a germline specific  
128 anillin whose depletion generates oocytes and, after fertilization, embryos, of varying  
129 size (Maddox et al., 2005) (Figure 1A). We monitored the length of mitosis in these  
130 embryos, using the time between nuclear envelope breakdown (NEBD) to the onset of  
131 cortical contractility (OCC) as markers for the entry into and exit from mitosis,  
132 respectively (Essex et al., 2009). We then correlated the length of mitosis to cytoplasmic  
133 volume. RNAi of *ani-2* did not affect cell cycle progression in control, *pch-2*, or *mad-1*  
134 mutants (Figure S1A), indicating that reducing cytoplasmic volume did not affect mitotic  
135 timing in these embryos. (In *C. elegans*, the genes that encode Mad1 and Mad2 are  
136 *mdf-1* and *mdf-2*, respectively. To avoid confusion, we will use *mad-1* and *mad-2*).

137

138 We performed double depletion of *ani-2* and *zyg-1* to induce the spindle checkpoint  
139 response in control embryos, *pch-2*, and *mad-1* mutants. ZYG-1 is essential for  
140 centrosome duplication and after the first embryonic division, its depletion generates  
141 monopolar spindles (O'Connell et al., 2001) and unattached kinetochores (Essex et al.,  
142 2009) (Figure 1B). Consistent with previous reports, as cells decreased in cell volume  
143 the length of the cell cycle delay, an indicator of spindle checkpoint strength, increased  
144 in control embryos (Galli and Morgan, 2016; Gerhold et al., 2018) (Figure 1C, Videos 1  
145 and 2). Surprisingly, as *pch-2* mutant embryos decreased in size, the spindle checkpoint

146 response more closely resembled that of control embryos than *mad-1* mutant embryos  
147 (Figure 1C, Videos 3 and 4). There was no significant difference between the slopes of  
148 the regression analysis of control and *pch-2* mutant data (p value = 0.1407), while the  
149 slopes between the regression analysis of *pch-2* and *mad-1* mutant data were  
150 significantly different (p value = 0.0007). We partitioned our data to show that *pch-2*  
151 mutant embryos fell into three clear categories: 1) wild-type sized embryos (more than 5  
152  $\times 10^3 \mu\text{m}^3$ ) in which PCH-2 was essential for the spindle checkpoint; 2) medium sized  
153 embryos (between  $3.5 \times 10^3 \mu\text{m}^3$  and  $5 \times 10^3 \mu\text{m}^3$ ), which exhibited an intermediate level  
154 of checkpoint function; and 3) small embryos (less than  $3.5 \times 10^3 \mu\text{m}^3$ ), in which PCH-2  
155 was completely dispensable for the spindle checkpoint response (Figure 1D).

156

157 We verified that the mitotic delay observed in *pch-2* embryos was a legitimate spindle  
158 checkpoint response by monitoring mitotic timing after performing double depletion of  
159 *ani-2* and *zyg-1* in *san-1* and *pch-2;san-1* mutant embryos. SAN-1 is the *C. elegans*  
160 ortholog of the essential spindle checkpoint factor, Mad3 (Nystul et al., 2003) (Figure  
161 S1B). There was no significant difference between the slopes of the regression analysis  
162 of *san-1* and *pch-2;san-1* data (p value = 0.8813). These data allow us to draw two  
163 important conclusions: 1) Since we observe robust spindle checkpoint activation in *pch-2*  
164 mutant embryos as they decrease in size and mitotic timing is similar to what we  
165 observe in control embryos, PCH-2 does not appear to affect spindle checkpoint  
166 silencing in *C. elegans*; and 2) the requirement for PCH-2 during spindle checkpoint  
167 activation is proportional to cell volume in AB cells with monopolar spindles.

168

169 **PCH-2 becomes dispensable for MAD-2 recruitment at unattached kinetochores in**  
170 **somatic cells experimentally reduced in size**

171 We showed that PCH-2 is required for robust recruitment of Mad2 at unattached  
172 kinetochores during spindle checkpoint activation in AB cells of two-cell embryos  
173 (Nelson et al., 2015). Therefore, we tested whether the checkpoint induced delay we  
174 observed in small *ani-2<sup>RNAi</sup>; zyg-1<sup>RNAi</sup>; pch-2* embryos was accompanied by increased  
175 recruitment of GFP::MAD-2 at unattached kinetochores. We quantified GFP::MAD-2  
176 recruitment at unattached kinetochores in pseudo-metaphase in small control and *pch-2*  
177 mutant embryos (less than  $3.5 \times 10^3 \mu\text{m}^3$ ) and compared it to the recruitment observed  
178 in wild-type sized embryos. Consistent with our previous results, GFP::MAD-2 was  
179 recruited to 20% of control levels in *pch-2* mutant embryos that were wild-type in size  
180 (Nelson et al., 2015) (Figures 2A and B). In small embryos, GFP::MAD-2 was recruited  
181 to unattached kinetochores in control embryos as expected (Figure 2B). In small *pch-2*  
182 mutant embryos, GFP::MAD-2 signal can be detected at unattached kinetochores  
183 (Figure 2B) and, when quantified, GFP::MAD-2 was partially restored to 58% of control  
184 levels (Figure 2B).

185

186 One explanation for why GFP::MAD-2 recruitment is not completely restored in small  
187 *pch-2; ani-2<sup>RNAi</sup>; zyg-1<sup>RNAi</sup>* mutant embryos may be that these smaller embryos require  
188 less MAD-2 recruitment to support a mitotic delay than control small embryos  
189 (Defachelles et al., 2015). Consistent with this idea, when we plotted GFP::MAD-2  
190 fluorescence against cell volume, we observed that the regression analysis of  
191 GFP::MAD-2 fluorescence at unattached kinetochores in *pch-2; ani-2<sup>RNAi</sup>; zyg-1<sup>RNAi</sup>*  
192 embryos exhibited a negative slope, showing improved GFP::MAD-2 recruitment to  
193 unattached kinetochores as cells got smaller, but still lower in fluorescence intensity than  
194 *ani-2<sup>RNAi</sup>; zyg-1<sup>RNAi</sup>* control embryos (Figure S2A). Surprisingly, the regression analysis for  
195 control embryos had a positive slope, suggesting that less GFP::MAD-2 is required at  
196 unattached kinetochores for spindle checkpoint function even in small control embryos



197 (Figure S2A). This was despite similar levels of soluble GFP::MAD2 in both genetic  
198 backgrounds (Figure S2B). Nevertheless, our experiments demonstrate that PCH-2 is  
199 dispensable for Mad2 recruitment at unattached kinetochores in AB cells with monopolar  
200 spindles.

201

## 202 **MAD-2 dosage controls checkpoint strength**

203 MAD-2 is localized to the nucleus and nuclear envelope in *C. elegans* oocytes (Bohr et  
204 al., 2015; Lawrence et al., 2015) (Figure 3A). Since *ani-2*<sup>RNAi</sup> treatment does not affect  
205 nuclear size (Figure S3), we reasoned that as cells are genetically manipulated to  
206 decrease in cell volume, the absolute amount of Mad2 protein is likely to remain  
207 constant but its concentration increases. This increase in concentration of Mad2, and O-  
208 Mad2 in particular, may obviate the requirement for PCH-2 in small embryos (Figure 3B).

209

210 To test this possibility, we initially attempted to directly visualize O-Mad2 in *C. elegans*  
211 embryos. Unfortunately, we were unable to perform this experiment with a commercial  
212 antibody (data not shown). Further, we could not directly probe total Mad2 concentration  
213 as cells decrease in volume upon treatment with *ani-2* RNAi because GFP::MAD-2 does  
214 not localize to the nucleus and instead localizes in the cytoplasm until NEBD (Essex et  
215 al., 2009; Nelson et al., 2015), making it an inaccurate reporter for this assay. Instead,  
216 we tested whether reducing Mad2 dosage affected checkpoint strength. We  
217 hypothesized that if Mad2 concentration influences checkpoint strength, reducing it by  
218 half should attenuate checkpoint strength in comparison to control animals. We  
219 performed double depletion of *ani-2* and *zyg-1* by RNAi in *mad-2* heterozygotes. Indeed,  
220 *mad-2* heterozygotes exhibited stronger spindle checkpoint strength as AB cells became  
221 smaller but not as robustly as control embryos (Figure 3C). The slopes of the linear  
222 regressions for both control and *mad-2* heterozygotes were significantly non-zero (p

223 value = 0.0002 for control and  $p = .0395$  for *mad-2/+*), unlike similar experiments with  
224 *mad-1* homozygotes ( $p$  value = 0.4197) (Figure 1B). Therefore, spindle checkpoint  
225 strength depends on MAD-2 dosage.

226

227 We wondered whether the decrease in Mad2 protein levels might restore the reliance on  
228 PCH-2 in small embryos. However, *pch-2;mad-2/+* double mutants exhibited a  
229 substantial decrease in the production and viability of embryos, preventing us from  
230 performing these experiments: *pch-2;mad-2/+* double mutants produced broods that  
231 were 14% of control animals and only 1% of these embryos were viable. Further, *pch-*  
232 *2;mad-2* double mutants could not be recovered from *pch-2;mad-2/+* mothers, a genetic  
233 interaction that we did not observe when we generated *pch-2;mad-1* double mutants  
234 (Bohr et al., 2015) or *pch-2;san-1* double mutants (Figure S1B). Thus, in addition to  
235 MAD-2 dosage controlling checkpoint strength, it collaborates with PCH-2 to promote *C.*  
236 *elegans* fertility and viability.

237

### 238 **PCH-2 is required for the spindle checkpoint response during embryogenesis**

239 During embryogenesis, cell volume decreases and spindle checkpoint strength  
240 increases (Galli and Morgan, 2016; Gerhold et al., 2018). Given our observation, that  
241 PCH-2 becomes dispensable as cell volume decreases in the AB cell of two-cell  
242 embryos, we assessed whether this also happens during normal embryogenesis.

243

244 We first performed this experiment in *perm-1<sup>RNAi</sup>* embryos treated with nocodazole. Cells  
245 of the AB lineage in control embryos exhibited a longer mitotic delay in 16-cell than in 4-  
246 cell embryos (Figure 4A), verifying that the spindle checkpoint increases in strength as  
247 cells decrease in volume during embryogenesis (Galli and Morgan, 2016; Gerhold et al.,  
248 2018). As a control, we performed the same experiment in *san-1* mutants and did not

249 detect a mitotic delay when these embryos were treated with nocodazole (Figure 4A).  
250 Consistent with the results that PCH-2 is required in small AB cells treated with  
251 nocodazole (Figure 3A), *pch-2* mutant embryos treated with nocodazole resembled *san-*  
252 *1* mutants (Figure 4A). Thus, as cells of the AB lineage naturally decrease in cell size  
253 during embryogenesis, PCH-2 is essential for the spindle checkpoint when microtubules  
254 are absent.

255

256 We also tested if a subtle increase in MAD-2 protein levels would suppress the spindle  
257 checkpoint defect in *pch-2* mutant embryos. The presence of a GFP::MAD-2 transgene,  
258 in addition to endogenous MAD-2, results in about 2.5 times more MAD-2 in worms. This  
259 slight overexpression generates a normal spindle checkpoint response in control AB  
260 cells and can bypass the requirement for checkpoint components MAD-3 or BUB-3  
261 (Essex et al., 2009), but not PCH-2 (Nelson et al., 2015). We found that overexpression  
262 of MAD-2 in control and *pch-2* mutant 4- and 16-cell embryos treated with nocodazole  
263 behaved similarly as their counterparts with normal levels of MAD-2 (Figure 4B).

264

265 Given that we activated the spindle checkpoint activation in *ani-2<sup>RNAi</sup>* embryos by  
266 generating monopolar spindles (Figures 1C and 3C), we also performed this experiment  
267 in embryos with monopolar spindles. We used a fast acting temperature sensitive allele  
268 of *zyg-1* (*zyg-1<sup>ts</sup>*) (O'Rourke et al., 2011) to activate the spindle checkpoint in developing  
269 embryos with a variable number of cells. We shifted embryos at different stages of  
270 development, verified the appearance of monopolar spindles and measured mitotic  
271 timing from NEBD to DECON. In control *zyg-1<sup>ts</sup>* mutant embryos, we observed a delay in  
272 mitotic timing in cells from the AB lineage and this delay only became marginally longer  
273 as embryos had more cells (Figure 4C), similar to previous reports (Gerhold et al.,  
274 2018). In stark contrast to our *ani-2<sup>RNAi</sup>* experiments, the mitotic timing observed in *pch-*

275 *2;zyg-1<sup>ts</sup>* mutant embryos was reduced in comparison to *zyg-1<sup>ts</sup>* embryos. Thus, similar  
276 to our results with embryos treated with nocodazole, PCH-2 is required for the spindle  
277 checkpoint as cells of the AB lineage naturally decrease in cell size during  
278 embryogenesis and when the checkpoint is activated by the presence of monopolar  
279 spindles. However, additional considerations may make direct comparisons between our  
280 *ani-2<sup>RNAi</sup>;zyg-1<sup>RNAi</sup>* experiments and *zyg-1<sup>ts</sup>* dividing embryos difficult (see Discussion).

281

### 282 **PCH-2 is responsible for the stronger spindle checkpoint in the germline lineage**

283 Cell fate is another important determinant of spindle checkpoint strength. In *C. elegans*  
284 embryos, the spindle checkpoint is stronger in germline precursor cells than similarly  
285 sized somatic counterparts (Galli and Morgan, 2016; Gerhold et al., 2018). However, as  
286 we observed with AB cells (Nelson et al., 2015), PCH-2 is essential for the spindle  
287 checkpoint in wildtype-sized P<sub>1</sub> cells (Figure S4A). Therefore, having established that  
288 PCH-2 becomes dispensable for the spindle checkpoint as two-cell embryos are  
289 genetically manipulated to become smaller (Figures 1C and D), we tested whether PCH-  
290 2 contributed to the stronger spindle checkpoint in P<sub>1</sub> cells of two-cell embryos treated  
291 with *ani-2* RNAi (Figures 5 and S4B). Consistent with other reports (Galli and Morgan,  
292 2016; Gerhold et al., 2018), when we performed double depletion of *ani-2* and *zyg-1* in  
293 control embryos and monitored mitotic timing, we observed P<sub>1</sub> cells with similar volumes  
294 as AB cells exhibiting a longer cell cycle delay (Figures 5A and S4B, Videos 5 and 6).  
295 Further, the regression analysis that best fit control P<sub>1</sub> data is significantly different and  
296 steeper than that of control AB cells (p value < 0.0001), indicating that variables in  
297 addition to cell volume contribute to the spindle checkpoint strength in germline  
298 precursor cells. When we knocked down both *ani-2* and *zyg-1* in *pch-2* mutant embryos,  
299 we no longer observed a significant difference (p value = 0.9096) between the slopes of

300 the regression analysis of P<sub>1</sub> and AB cells (Figures 5B and S4B, Videos 7 and 8),  
301 indicating that PCH-2 is responsible for the stronger checkpoint in P<sub>1</sub> cells.  
302  
303 We observed that cell cycle timing was faster in *pch-2* mutant P<sub>1</sub> cells than similarly  
304 sized *pch-2* mutant AB cells after treatment with *ani-2* and *zyg-1* RNAi (Figures 5B and  
305 S4B). We wondered if embryonic germline precursor cells might rely on some spindle  
306 checkpoint proteins for normal mitotic timing, analogous to mitotically dividing stem cells  
307 in the *C. elegans* germline (Gerhold et al., 2015) and similar to mammalian cultured cells  
308 (Ma and Poon, 2016; Meraldi et al., 2004; Rodriguez-Bravo et al., 2014). To address  
309 this, we measured normal mitotic timing in AB and P<sub>1</sub> cells of both control and *pch-*  
310 *2* mutant embryos. We found that while normal mitotic timing is unaffected by mutation of  
311 *pch-2* in AB cells, *pch-2* mutant P<sub>1</sub> cells go through mitosis significantly faster than  
312 control P<sub>1</sub> cells (Figure 5C), thus providing an explanation for the faster cell cycle timing  
313 in *pch-2* mutant P<sub>1</sub> cells with the same cell volume as *pch-2* mutant AB cells after  
314 treatment with *ani-2* and *zyg-1* RNAi. We saw a decrease in the cell cycle timing of P<sub>1</sub>  
315 cells in *mad-1* mutants but this was not statistically different than control P<sub>1</sub> cells (Figure  
316 5C).

317

### 318 **PCH-2's enrichment in P<sub>1</sub> cells depends on PAR-1**

319 Cell fate is driven by the asymmetric distribution of various determinants between  
320 somatic and germline lineages during early divisions of the *C. elegans* embryo (Rose  
321 and Gonczy, 2014). Since we found that PCH-2 promoted the spindle checkpoint  
322 strength in both AB and P<sub>1</sub> cells, but even more dramatically in P<sub>1</sub> cells, we asked if  
323 PCH-2 was regulated differently between these cells. First, we tested whether PCH-  
324 2::GFP could also support the stronger checkpoint in P<sub>1</sub> cells. We treated embryos

325 expressing PCH-2::GFP with *zyg-1* RNAi and evaluated mitotic timing in both AB and P<sub>1</sub>  
326 cells, in the presence or absence of monopolar spindles, using chromosome  
327 decondensation as a marker for mitotic exit. P<sub>1</sub> cells expressing PCH-2::GFP had full  
328 checkpoint function, exhibiting a mitotic delay longer than AB cells also expressing PCH-  
329 2::GFP (Figure 6A).

330

331 Previous transcriptome analysis of PCH-2 did not reveal asymmetric enrichment of PCH-  
332 2 mRNA between AB and P<sub>1</sub> cells (Tintori et al., 2016). We tested whether PCH-2::GFP  
333 exhibited differences in protein levels between AB and P<sub>1</sub> cells. First, we assessed  
334 whether PCH-2::GFP was more enriched in pseudo-metaphase at unattached  
335 kinetochores in P<sub>1</sub> than AB cells. We quantified PCH-2::GFP fluorescence at unattached  
336 kinetochores in both AB and P<sub>1</sub> cells of embryos treated with *zyg-1* RNAi but did not  
337 detect any difference between the two cell types (Figures S5A and B). Similarly, we did  
338 not detect any difference in GFP::MAD-2 recruitment at unattached kinetochores  
339 between AB and P<sub>1</sub> cells in *zyg-1*<sup>RNAi</sup> embryos (Figures S5C and D).

340

341 Since neither PCH-2::GFP or GFP::MAD-2 recruitment to unattached kinetochores were  
342 different between AB and P<sub>1</sub> cells (Figure S5) and given the existence of a “cloud” of  
343 checkpoint factors, including MAD-2 and PCH-2, around chromosomes, even during  
344 normal cell cycles (Essex et al., 2009; Nelson et al., 2015), we quantified PCH-2::GFP  
345 fluorescence around mitotic chromosomes in AB and P<sub>1</sub> cells during unperturbed cell  
346 cycles. Similar to AB cells (Nelson et al., 2015), we observed PCH-2::GFP enriched in  
347 the area around the chromosomes in prometaphase in P<sub>1</sub> cells (Figure 6B). When we  
348 quantified the fluorescence of PCH-2::GFP in this area surrounding chromosomes after  
349 NEBD in both AB and P<sub>1</sub> cells, we detected a statistically significant enrichment of PCH-  
350 2::GFP in P<sub>1</sub> cells (Figure 6C). To evaluate whether this enrichment was the indirect

351 consequence of the smaller volume of P<sub>1</sub> cells, we also quantified PCH-2::GFP  
352 fluorescence in *gpr-1/2<sup>RNAi</sup>* embryos. This double knockdown equalizes the size of AB  
353 and P<sub>1</sub> cells without affecting their cell fate (Colombo et al., 2003; Gotta et al., 2003;  
354 Srinivasan et al., 2003). *gpr-1/2<sup>RNAi</sup>* embryos showed a similar enrichment of PCH-  
355 2::GFP in P<sub>1</sub> cells as control embryos (Figure S7).

356

357 To better understand the relationship between PCH-2 enrichment in P<sub>1</sub> cells and cell  
358 fate, we abrogated the asymmetry of the two-cell embryo by performing RNAi against  
359 the essential polarity factor, PAR-1 (Guo and Kemphues, 1995). In *par-1<sup>RNAi</sup>* mutant  
360 embryos, both AB and P<sub>1</sub> cells exhibit the same checkpoint strength as control P<sub>1</sub> cells  
361 (Gerhold et al., 2018), indicating that the stronger spindle checkpoint response in the P<sub>1</sub>  
362 cells depends on this asymmetric division. Despite the loss of cell fate in *par-1<sup>RNAi</sup>*  
363 embryos, we will refer to the anterior blastomere as AB and the posterior as P<sub>1</sub>. We  
364 quantified PCH-2::GFP fluorescence in the area around chromosomes in AB and P<sub>1</sub>  
365 cells after *par-1* RNAi and observed that the fluorescence of PCH-2::GFP, despite being  
366 slightly lower in P<sub>1</sub> cells, was not significantly different between AB and P<sub>1</sub> cells, unlike  
367 what we observed in embryos exposed to control RNAi (Figures 6D and E). Further,  
368 similar to the effect on spindle checkpoint strength (Gerhold et al., 2018), we found that  
369 the concentration of PCH-2::GFP in *par-1<sup>RNAi</sup>* AB cells was greater than that of control  
370 AB cells (data not shown) and more closely resembled PCH-2::GFP concentration in P<sub>1</sub>  
371 cells treated with control RNAi (p value = 0.348). Therefore, PCH-2::GFP's enrichment  
372 around mitotic chromosomes in P<sub>1</sub> cells depends on a conserved factor that induces  
373 embryonic asymmetry and germline cell fate, PAR-1.

374

375 **The stronger checkpoint in P<sub>1</sub> cells depends on CMT-1**

376 In vitro, the *C. elegans* ortholog of p31<sup>comet</sup>, CMT-1, is required for PCH-2 to bind and  
377 remodel Mad2 (Ye et al., 2015). In addition to this role, CMT-1 is also required to localize  
378 PCH-2 to unattached kinetochores and generate a robust spindle checkpoint response  
379 in AB cells (Nelson et al., 2015). Therefore, we reasoned that CMT-1 might also be  
380 required for the stronger checkpoint in P<sub>1</sub> cells.

381

382 To test this possibility, we first performed double knockdown of *ani-2* and *zyg-1* in *cmt-1*  
383 mutants and monitored the length of the spindle checkpoint response as AB and P<sub>1</sub> cells  
384 became smaller (Figure 7A, Videos 9-12). Similar to *pch-2;ani-2<sup>RNAi</sup>;zyg-1<sup>RNAi</sup>* mutants  
385 (Figure 5B), the stronger spindle checkpoint response in P<sub>1</sub> cells was lost in *cmt-1;ani-*  
386 *2<sup>RNAi</sup>;zyg-1<sup>RNAi</sup>* mutants and we did not observe any statistical difference between the  
387 between the slopes of the regression analysis of P<sub>1</sub> and AB cells (p value = 0.9403). We  
388 also observed that cell cycle timing was faster in *cmt-1* P<sub>1</sub> cells that were similar in  
389 volume to *cmt-1* AB cells. Thus, CMT-1 is also essential to promote spindle checkpoint  
390 strength in germline precursor cells.

391

392 We also performed *zyg-1* RNAi on control and *cmt-1* mutant embryos and monitored  
393 mitotic timing in both AB and P<sub>1</sub> cells. AB and P<sub>1</sub> cells of control and *cmt-1* mutant  
394 embryos treated with control RNAi had similar mitotic timing. Unlike similar experiments  
395 in *pch-2* mutants (Figure 5C), we did not detect a statistically significant difference  
396 between cell cycle time in P<sub>1</sub> cells between wildtype and *cmt-1* mutants embryos (Figure  
397 7B), suggesting that *ani-2<sup>RNAi</sup>;zyg-1<sup>RNAi</sup>* embryos might be more sensitive to subtle  
398 perturbations in cell cycle timing. In *zyg-1<sup>RNAi</sup>* embryos, P<sub>1</sub> cells exhibited a stronger  
399 checkpoint response than AB cells (Figure 7B). By contrast, both AB and P<sub>1</sub> cells in *cmt-*  
400 *1;zyg-1<sup>RNAi</sup>* mutant embryos exhibited similar spindle checkpoint delays (Figure 7B).



401 Despite having spindle checkpoint responses that were less robust than that of control  
402 *zyg-1<sup>RNAi</sup>* embryos, AB and P<sub>1</sub> cells in *cmt-1* mutant embryos treated with *zyg-1* RNAi  
403 spent significantly longer in mitosis than *cmt-1* mutant embryos treated with control RNAi  
404 (Figure 7B), indicating that they activated a weaker spindle checkpoint response, similar  
405 to our published results (Nelson et al., 2015). More importantly, *cmt-1;zyg-1<sup>RNAi</sup>* mutant  
406 embryos failed to generate a stronger checkpoint in P<sub>1</sub> cells, consistent with *cmt-1;ani-*  
407 *2<sup>RNAi</sup>;zyg-1<sup>RNAi</sup>* experiments (Figure 7A).

408

409 Aside from localizing PCH-2 to unattached kinetochores (Nelson et al., 2015), we  
410 wondered if CMT-1 was required for any other aspects of PCH-2 regulation. Therefore,  
411 we tested whether CMT-1 was necessary for PCH-2's asymmetric enrichment in P<sub>1</sub>  
412 cells. We quantified PCH-2::GFP fluorescence in prometaphase in the area around  
413 chromosomes in both *cmt-1* mutant AB and P<sub>1</sub> cells (Figure 7C). First, we found that  
414 PCH-2::GFP fluorescence was slightly higher in AB cells in *cmt-1* mutants than control  
415 embryos (Figure 7D). We saw a similar result in our *par-1* RNAi experiments (data not  
416 shown), although in both cases these increases were not statistically significant.  
417 However, unlike *par-1<sup>RNAi</sup>* embryos (Gerhold et al., 2018), this increase in PCH-2::GFP  
418 was not accompanied by an increase in checkpoint strength (Figure 7B), consistent with  
419 our hypothesis that the weaker checkpoint in *cmt-1* AB cells is a consequence of PCH-  
420 2's absence from unattached kinetochores (Nelson et al., 2015). Further, when we  
421 compared the quantification of PCH-2::GFP fluorescence in *cmt-1* mutant AB and P<sub>1</sub>  
422 cells, we did not detect a significant difference between the two cells (Figure 7E), unlike  
423 our experiment in control embryos (Figures 6B and C), indicating that CMT-1 contributes  
424 to the asymmetric enrichment of PCH-2 in P<sub>1</sub> cells. Thus, CMT-1 promotes spindle  
425 checkpoint strength through two mechanisms: localizing PCH-2 to unattached  
426 kinetochores and ensuring its enrichment in germline precursor cells.

427

## 428 **DISCUSSION**

429

430 The role of PCH-2, and its mammalian ortholog TRIP13, in the spindle checkpoint has  
431 been enigmatic. Originally identified as a checkpoint silencing factor (Alfieri et al., 2018;  
432 Brulotte et al., 2017; Eytan et al., 2014; Miniowitz-Shemtov et al., 2015; Wang et al.,  
433 2014; Ye et al., 2015), more recent evidence also indicates a role in promoting the  
434 checkpoint response (Ma and Poon, 2016; Ma and Poon, 2018; Nelson et al., 2015; Yost  
435 et al., 2017). It's clear that the reliance on PCH-2/TRIP13 in checkpoint activation  
436 reflects the relative levels and availability of O-Mad2 (Ma and Poon, 2018). We show  
437 here that PCH-2 also controls checkpoint strength. We propose that PCH-2  
438 accomplishes this by regulating O-Mad2 availability, specifically at and near unattached  
439 kinetochores, providing an unanticipated mechanism to explain checkpoint strength  
440 (Figure 8). This role in checkpoint strength may be particularly important in large cells,  
441 such as oocytes and cells in early embryos, as well as cells that give rise to immortal  
442 germ cells.

443

444 Our model assumes that two cell embryos have a significant amount of O-Mad2  
445 available, even when PCH-2 function is lost (Figure 8), unlike what is reported in  
446 mammalian cells (Ma and Poon, 2016). Given that this is a developmental system in  
447 which embryos have only undergone a single mitotic division before we perform our  
448 assays, we propose that O-Mad2 is not limiting in very early embryos, even in *pch-2* null  
449 mutants. In this way, *C. elegans* two-cell embryos would be analogous to mammalian  
450 cells undergoing cell division soon after acute depletion of TRIP13 (Ma and Poon, 2018).  
451 Unfortunately, we were unable to directly probe O-Mad2 concentration or its availability  
452 at or near unattached kinetochores in small *ani-2<sup>RNAi</sup>* embryos or germline precursor

453 cells. However, we think that several pieces of data support this hypothesis: PCH-2's  
454 characterized biochemical activity converts C-Mad2 to O-Mad2 (Alfieri et al., 2018;  
455 Brulotte et al., 2017; Ye et al., 2015); an inability to localize and/or enrich PCH-2 at and  
456 around unattached kinetochores affects checkpoint strength (Nelson et al., 2015;  
457 Gerhold et al., 2018 and Figures 6 and 7); the delay we observe in small *pch-2;ani-*  
458 *2<sup>RNAi</sup>;zyg-1<sup>RNAi</sup>* embryos is checkpoint dependent (Figure S1B); as cells are genetically  
459 manipulated to become smaller, robust checkpoint strength depends on Mad2 dosage  
460 (Figure 2C); GFP::MAD-2 localization is restored to unattached kinetochores in small  
461 *pch-2;ani-2<sup>RNAi</sup>;zyg-1<sup>RNAi</sup>* embryos (Figures 2D and E); and *pch-2* and *mad-2* mutant  
462 alleles genetically interact, indicating a close functional relationship between these two  
463 genes during embryogenesis.

464

465 Another prediction of our model is that overexpression of Mad2 should also make PCH-2  
466 dispensable for spindle checkpoint activation. We've shown that subtle elevations of  
467 Mad2 protein levels cannot suppress the requirement for PCH-2 in two-cell embryos  
468 (Nelson et al., 2015). Unfortunately, more dramatic overexpression experiments are  
469 technically difficult in *C. elegans*. Further, it's likely that strong overexpression of Mad2 in  
470 *C. elegans* embryos will delay normal mitosis, consistent with similar findings in  
471 mammalian cells (Marks et al., 2017) and budding yeast (Mariani et al., 2012). In this  
472 way, PCH-2's function may provide a useful buffer: Since Mad2 protein levels may need  
473 to stay within a narrow range to allow normal mitotic timing, PCH-2's localization at and  
474 near unattached kinetochores provide a mechanism to increase O-Mad2's local  
475 concentration to promote effective and efficient signaling during checkpoint activation.

476

477 Despite our findings that PCH-2 becomes dispensable for spindle checkpoint activation  
478 as two-cell embryos are experimentally induced to decrease in volume, PCH-2 remains

479 essential for the spindle checkpoint as AB cells normally decrease in volume during  
480 embryogenesis (Figure 4). This inconsistency could be explained by a variety of  
481 reasons. O-Mad2 may eventually become limiting in cells of the AB lineage with  
482 successive divisions after the two-cell stage, resulting in a greater reliance on PCH-2  
483 function. Moreover, it may also suggest that relative levels of O-Mad2 and C-Mad2 are  
484 more stringently regulated as embryonic development progresses and the multi-cellular  
485 embryo becomes more complex. This possibility is supported by our finding that PCH-2  
486 regulates normal cell cycle timing in P<sub>1</sub> cells, but not AB cells (Figure 5C), which implies  
487 that variations in O-Mad2/C-Mad2 ratios influence normal mitotic timing in cells with  
488 specific developmental fates. In addition, unlike the nuclei of two-cell embryos treated  
489 with *ani-2*<sup>RNAi</sup> (Figure S3), nuclear volume scales with cell volume during embryogenesis  
490 (Gerhold et al., 2018). Therefore, the concentration of Mad2 may not necessarily  
491 increase as cell size decreases in cells of the developing embryo, making direct  
492 comparisons between small cells obtained by *ani-2*<sup>RNAi</sup> treatment and small cells  
493 resulting from normal embryogenesis challenging. Finally, recent reports have indicated  
494 that, during embryogenesis in other systems, cell volume may not be a major contributor  
495 to spindle checkpoint strength (Chenevert et al., 2019; Vazquez-Diez et al., 2019).  
496 Indeed, in *C. elegans*, when only AB cells are monitored during early embryogenesis,  
497 they exhibit very minor increases, if any, in checkpoint strength (Galli and Morgan, 2016;  
498 Gerhold et al., 2018 and Figure 4). This may suggest that cell fate is generally a more  
499 important determinant of spindle checkpoint strength during normal embryogenesis,  
500 potentially reconciling reports from a wide array of systems.

501

502 Our experiments identify CMT-1, the *C. elegans* ortholog of mammalian p31<sup>comet</sup>, as an  
503 important regulator of PCH-2 function and, as a result, checkpoint strength. In addition to  
504 its requirement in facilitating PCH-2's ability to interact with its substrate, Mad2 (Alfieri et

505 al., 2018; Brulotte et al., 2017; Miniowitz-Shemtov et al., 2015; Ye et al., 2015), CMT-1  
506 localizes PCH-2 to unattached kinetochores (Nelson et al., 2015) and promotes PCH-2's  
507 enrichment in P<sub>1</sub> cells (Figure 7). We propose that both of these roles contribute to  
508 checkpoint strength. In large AB cells, CMT-1 ensures PCH-2's presence at unattached  
509 kinetochores, increasing the local concentration of O-Mad2, driving the production of  
510 soluble C-Mad2 and MCC and enforcing a robust checkpoint (Figure 8A). In P<sub>1</sub> cells, the  
511 combination of PCH-2's localization at kinetochores and its enrichment around  
512 chromosomes and near unattached kinetochores produces a checkpoint stronger than  
513 somatic cells (Figure 8C). It's striking that, when CMT-1 is absent, AB cells, in which  
514 there is more PCH-2 (Figure 7D), and P<sub>1</sub> cells, which are slightly smaller than AB cells,  
515 exhibit similar checkpoint strength (Figure 7B). This indicates that even these cells  
516 depend on PCH-2 to be present at unattached kinetochores to increase the local  
517 concentration of O-Mad2 and promote checkpoint strength.

518

519 P<sub>1</sub> cells in both *pch-2;ani-2<sup>RNAi</sup>;zyg-1<sup>RNAi</sup>* and *cmt-1;ani-2<sup>RNAi</sup>;zyg-1<sup>RNAi</sup>* mutants show  
520 faster cell cycle timing than similarly sized AB cells of the same genotype (Figures 5B  
521 and 7A). However, only *pch-2* mutants significantly affect cell cycle timing in unperturbed  
522 P<sub>1</sub> cells, (Figure 5C); P<sub>1</sub> cells in *cmt-1* and *mad-1* mutants show accelerated cell cycle  
523 timing but this is not significantly faster than control (Figures 5C and 7B). Given the  
524 rapidity of cell cycles in these early embryos, it's possible that *ani-2<sup>RNAi</sup>;zyg-1<sup>RNAi</sup>*  
525 experiments provide greater sensitivity to observe subtle accelerations in cell cycle  
526 timing and that some subset of spindle checkpoint components, including PCH-2, CMT-  
527 1, MAD-1 and MAD-2 regulate normal cell cycle timing in germline precursor cells,  
528 similar to the role of MAD-1 and MAD-2 in germline mitotic nuclei (Gerhold et al., 2015).  
529 An alternative hypothesis that we do not favor is that only PCH-2 regulates cell cycle  
530 timing in P<sub>1</sub> cells, in a mechanism independent of other spindle checkpoint proteins.

531

532 Evolutionary analysis across phyla have revealed a close co-evolutionary relationship  
533 between PCH-2 and its orthologs and HORMA domain containing proteins, including  
534 CMT-1 and Mad2 (van Hooff et al., 2017; Vleugel et al., 2012). However, some  
535 organisms that rely on the templated conversion of O-Mad2 to C-Mad2 to assemble the  
536 MCC, such as budding and fission yeasts (Chao et al., 2012; Nezi et al., 2006) either  
537 don't express their PCH-2 ortholog during mitosis (budding yeast) (San-Segundo and  
538 Roeder, 1999) or don't have a PCH-2 ortholog in their genome (fission yeast) (Wu and  
539 Burgess, 2006). This is potentially explained by cell volume: Both budding and fission  
540 yeasts are two orders of magnitude smaller than mammalian cells and *C. elegans*  
541 embryos. They also undergo closed mitosis, in which the nuclear envelope does not  
542 break down, providing an additional opportunity to concentrate factors required for  
543 mitosis. We propose that recruiting O-Mad2 to unattached kinetochores may not present  
544 as great a challenge in these significantly smaller cells, making a factor required to  
545 increase the local concentration of O-Mad2 at unattached kinetochores unnecessary.

546

547 An obvious question our experiments raise is how PCH-2 is enriched in P<sub>1</sub> cells.  
548 Germline precursor cells are transcriptionally silent until gastrulation (Seydoux et al.,  
549 1996) and sequencing of mRNA in early embryos shows that both CMT-1 and PCH-2  
550 mRNA are not enriched in germline precursor cells (Tintori et al., 2016), indicating that  
551 enrichment of PCH-2 is likely to occur at the level of protein regulation. Understanding  
552 this regulation, its control by developmental events and its effect on the relative levels of  
553 O-Mad2 and C-Mad2 in different cell types promises to be an exciting area of  
554 investigation.

555

556 **MATERIALS AND METHODS**

557

### 558 **Worms strains**

559 The *C. elegans* Bristol N2 (Brenner, 1974) was used as the wild-type strain. Most strains  
560 were maintained at 20°C, except for *zyg-1(or297)* strains, which were maintained at  
561 15°C. See Table S1 for the list of all the strains used in this study.

562

### 563 **Immunostaining**

564 Immunostaining was performed on adult worms 48h after L4, as described in (Bhalla and  
565 Dernburg, 2005). The antibodies used were rabbit anti-MAD-2 (1/500; (Essex et al.,  
566 2009) and mouse anti-MAb414 (1/400; (Davis and Blobel, 1986). Secondary antibodies  
567 were Alexa Fluor 488 anti-rabbit (Invitrogen) and Cy3 anti-mouse (Jackson  
568 ImmunoResearch Laboratories, Inc.) diluted at 1:500. Antibody against MAD-2 was a gift  
569 from A. Desai (Ludwig Institute/University of California, San Diego, La Jolla, CA).

570

571 Images were acquired on a DeltaVision Personal DV microscope (GE Healthcare)  
572 equipped with a 100× NA 1.40 oil-immersion objective (Olympus), a short ARC xenon  
573 lamp (GE Healthcare) and using a CoolSNAP charge-coupled camera (Roper Scientific).  
574 Z-stacks were collected at 0.2 μm Z-spacing and processed by constrained, iterative  
575 deconvolution. Imaging, image scaling, and analysis were performed using functions in  
576 the softWoRx software package (GE Healthcare). Projections were calculated by a  
577 maximum intensity algorithm. Composite images were assembled and some false  
578 coloring was performed with Fiji.

579

### 580 **Live imaging of two-cell embryos**

581 For live imaging of two-cell embryos, worms were dissected on glass coverslips in egg  
582 buffer and then mounted on 2% agar pads. Images were acquired every 1 minute or 20

583 seconds on a DeltaVision Personal DV microscope as described in the previous section;  
584 except that the distance between two planes was 2  $\mu\text{m}$ . Mitotic timing was measured  
585 from NEBD to OCC as described in (Nelson et al., 2015). Cell volumes were measured  
586 as described in (Galli and Morgan, 2016). To measure the nuclear area, a sum  
587 projection of the embryo was generated 1 minute before chromosomes began to  
588 condense and the area was measured with Fiji (Figure S2A).

589

### 590 **Live imaging of embryogenesis**

591 After treatment with *perm-1<sup>RNAi</sup>* (see below), worms were dissected onto a coverslip with  
592 egg salt buffer (118 mM NaCl, 48 mM KCl) supplemented with 10 mM PIPES pH 7.3, 1  
593 mM ATP and 10 mM sucrose. Embryos and adult carcasses were transferred into a well  
594 of an 8-well plate (ibidi 1  $\mu$ -Slide 8 Well Glass bottom) that had been freshly coated with  
595 0.1% Poly-L-Lysine solution (Sigma P8920) and extensively washed. Time-lapse videos  
596 were acquired with a Solamere spinning disk confocal system piloted by  $\mu$ Manager  
597 software (Edelstein et al., 2014) and equipped with a Yokogawa CSUX-1 scan head, a  
598 Nikon (Garden City, NY) TE2000-E inverted stand, a Hamamatsu ImageEM  $\times 2$  camera,  
599 LX/MAS 489 nm and LS/MAS 561 nm laser, and Plan Apo  $\times 60/1.4$  numerical aperture  
600 oil objective. Acquisition times per frame were 50 ms using 5% of the lasers power for  
601 both channels, and images were obtained as stacks of planes at 2  $\mu\text{m}$  intervals taken  
602 every 1 minute. Nocodazole was added from a 5X stock to a final concentration of 50  $\mu\text{M}$   
603 after the first time point. Mitotic timing was measured from NEBD to DECON as  
604 described in (Essex et al., 2009).

605

606 To image embryogenesis in *zyg-1(or297)* mutants, images were generated under the  
607 same conditions as previously described for the live imaging of two-cell embryos with a  
608 few modifications: Images were acquired every 20 seconds on a DeltaVision Personal



609 DV microscope in a room heated to 26°C. Mitotic timing was measured from NEBD to  
610 DECON as described in (Essex et al., 2009).

611

### 612 **Quantification of fluorescence intensity**

613 To quantify GFP::MAD-2 and PCH-2::GFP levels, images were generated under the  
614 same conditions as previously described for the live imaging of two-cell embryos with a  
615 few modifications: only the nucleus was imaged, the interval between the four planes  
616 was 1  $\mu\text{m}$  and images were collected every 20 seconds. Quantification of fluorescence  
617 at kinetochores was performed in Fiji as described in (Moyle et al., 2014; Nelson et al.,  
618 2015) and fluorescence in the cytoplasm as described in (Galli and Morgan, 2016). In  
619 some of our movies, identifying a clear metaphase plate was more difficult in AB than P<sub>1</sub>  
620 cells. Therefore, to ensure that we were quantifying PCH-2::GFP fluorescence around  
621 mitotic chromosomes at the same stage in mitosis in these two cell types, PCH-2::GFP  
622 was quantified in frames that were normalized relative to NEBD and mitotic exit. Sum  
623 intensity projections were generated and fluorescence in the area around mitotic  
624 chromosomes was measured in Fiji. Background fluorescence was measured in a 30  
625 pixel band around this “cloud” and subtracted from the initial fluorescence intensity to  
626 determine the final fluorescence value. To measure the cell volume, one Z-stack of the  
627 entire cell was taken at NEBD at 2  $\mu\text{m}$  Z-spacing.

628

### 629 **Feeding RNA interference (RNAi)**

630 *C. elegans* strains were fed HT115 bacteria expressing the desired dsRNA after IPTG  
631 induction. Bacterial strains containing RNAi vectors were cultured overnight at 37°C,  
632 centrifuged, and the pellet was resuspended in 1/50 of the original volume. 100  $\mu\text{l}$  of  
633 concentrated culture was spotted onto a nematode growth medium (NGM) plate

634 containing 1 mM IPTG and 50 µg/µl of kanamycin or carbenicillin and the plate was  
635 incubated overnight at 37°C.

636

637 For *ani-2* RNAi, gravid adults were bleached onto the RNAi plate and their progeny was  
638 allowed to develop at 20°C during 2.5 days. Then, L4s were transferred to a fresh plate  
639 containing OP50 or *zyg-1* RNAi bacteria.

640

641 For *zyg-1* RNAi, L4s were transferred (from an OP50 or *ani-2* RNAi plate) onto a *zyg-1*  
642 RNAi plate and cultured 1.5 days at 20°C.

643

644 For *perm-1* RNAi, young adults (8h post L4) were incubated onto *perm-1* RNAi plates for  
645 16-20 hours at 15°C.

646

647 For *par-1* and *gpr-1/2* RNAi, gravid adults were bleached onto control RNAi (L4440)  
648 plates and their progeny were allowed to develop at 15°C for 3 days. L4s were then  
649 transferred onto *par-1*, *gpr-1/2* RNAi or control RNAi plates and incubated at 15°C for 3  
650 days.

651

## 652 **Statistical Analysis**

653 Linear regression analysis and assessing significance of this data (Figures 1C, 3C, 5A,  
654 5B, 7A, S1C, S1D, S2A, S4B) was performed using GrapPad Prism version 6 for  
655 Macintosh. For all other data, significance was assessed by performing t-tests (Figures  
656 1D, 2B, 3C, 3D, 3E, 4A, 4B, 4C, 5C, 6A, 6C, 6E, 7B, 7D, 7E, S4A, S5B, S5D, S6B and  
657 S7C). In all graphs, a \* indicates a p value < 0.05, \*\* indicates a p value < 0.01 and \*\*\* a  
658 p value < 0.0001.

659

660 **ACKNOWLEDGEMENTS**

661

662 We would like to thank Arshad Desai, Karen Oegema, Susan Strome and David Morgan  
663 for valuable strains and reagents. This work was supported by the NIH (grant numbers  
664 T32GM008646 [C.R.N. and A.R.] and R01GM097144 [N.B.]). Some strains were  
665 provided by the CGC, which is funded by NIH Office of Research Infrastructure  
666 Programs (P40 OD010440).

667

668 **CONTRIBUTIONS**

669

670 Conceptualization and Methodology, L.D., A.E.R., C.R.N. and N.B.; Investigation, L.D.,  
671 A.E.R., and C.R.N.; Writing - Original Draft, L.D. and N.B.; Writing - Review &  
672 Editing, L.D., A.E.R., C.R.N. and N.B.; Supervision and Funding Acquisition, N.B.

673

674 **COMPETING INTERESTS**

675

676 The authors declare no competing interests.

677 **REFERENCES**

- 678 Alfieri, C., L. Chang, and D. Barford. 2018. Mechanism for remodelling of the cell cycle  
679 checkpoint protein MAD2 by the ATPase TRIP13. *Nature*. 559:274-278.
- 680 Aravind, L., and E.V. Koonin. 1998. The HORMA domain: a common structural  
681 denominator in mitotic checkpoints, chromosome synapsis and DNA repair.  
682 *Trends Biochem Sci*. 23:284-286.
- 683 Bhalla, N., and A.F. Dernburg. 2005. A conserved checkpoint monitors meiotic  
684 chromosome synapsis in *Caenorhabditis elegans*. *Science*. 310:1683-1686.
- 685 Bohr, T., C.R. Nelson, E. Klee, and N. Bhalla. 2015. Spindle assembly checkpoint  
686 proteins regulate and monitor meiotic synapsis in *C. elegans*. *J Cell Biol*.  
687 211:233-242.
- 688 Brenner, S. 1974. The genetics of *Caenorhabditis elegans*. *Genetics*. 77:71-94.
- 689 Brulotte, M.L., B.C. Jeong, F. Li, B. Li, E.B. Yu, Q. Wu, C.A. Brautigam, H. Yu, and X.  
690 Luo. 2017. Mechanistic insight into TRIP13-catalyzed Mad2 structural transition  
691 and spindle checkpoint silencing. *Nat Commun*. 8:1956.
- 692 Chao, W.C., K. Kulkarni, Z. Zhang, E.H. Kong, and D. Barford. 2012. Structure of the  
693 mitotic checkpoint complex. *Nature*. 484:208-213.
- 694 Chen, R.H., A. Shevchenko, M. Mann, and A.W. Murray. 1998. Spindle checkpoint  
695 protein Xmad1 recruits Xmad2 to unattached kinetochores. *J Cell Biol*. 143:283-  
696 295.
- 697 Chen, R.H., J.C. Waters, E.D. Salmon, and A.W. Murray. 1996. Association of spindle  
698 assembly checkpoint component XMAD2 with unattached kinetochores. *Science*.  
699 274:242-246.
- 700 Chenevert, J., M. Roca, L. Besnardeau, A. Ruggiero, D. Nabi, A. McDougall, R.R.  
701 Copley, E. Christians, and S. Castagnetti. 2019. The spindle assembly

702 checkpoint functions during early development in non-chordate embryos.  
703 *bioRxiv*.

704 Collin, P., O. Nashchekina, R. Walker, and J. Pines. 2013. The spindle assembly  
705 checkpoint works like a rheostat rather than a toggle switch. *Nat Cell Biol*.  
706 15:1378-1385.

707 Colombo, K., S.W. Grill, R.J. Kimple, F.S. Willard, D.P. Siderovski, and P. Gonczy. 2003.  
708 Translation of polarity cues into asymmetric spindle positioning in *Caenorhabditis*  
709 *elegans* embryos. *Science*. 300:1957-1961.

710 Davis, L.I., and G. Blobel. 1986. Identification and characterization of a nuclear pore  
711 complex protein. *Cell*. 45:699-709.

712 De Antoni, A., C.G. Pearson, D. Cimini, J.C. Canman, V. Sala, L. Nezi, M. Mapelli, L.  
713 Sironi, M. Faretta, E.D. Salmon, and A. Musacchio. 2005. The Mad1/Mad2  
714 complex as a template for Mad2 activation in the spindle assembly checkpoint.  
715 *Current biology : CB*. 15:214-225.

716 Defachelles, L., S.G. Hainline, A. Menant, L.A. Lee, and R.E. Karess. 2015. A maternal  
717 effect rough deal mutation suggests that multiple pathways regulate *Drosophila*  
718 RZZ kinetochore recruitment. *J Cell Sci*. 128:1204-1216.

719 Dick, A.E., and D.W. Gerlich. 2013. Kinetic framework of spindle assembly checkpoint  
720 signalling. *Nat Cell Biol*. 15:1370-1377.

721 Edelstein, A.D., M.A. Tsuchida, N. Amodaj, H. Pinkard, R.D. Vale, and N. Stuurman.  
722 2014. Advanced methods of microscope control using muManager software. *J*  
723 *Biol Methods*. 1.

724 Essex, A., A. Dammermann, L. Lewellyn, K. Oegema, and A. Desai. 2009. Systematic  
725 analysis in *Caenorhabditis elegans* reveals that the spindle checkpoint is  
726 composed of two largely independent branches. *Mol Biol Cell*. 20:1252-1267.

- 727 Eytan, E., K. Wang, S. Miniowitz-Shemtov, D. Sitry-Shevah, S. Kaisari, T.J. Yen, S.T.  
728 Liu, and A. Hershko. 2014. Disassembly of mitotic checkpoint complexes by the  
729 joint action of the AAA-ATPase TRIP13 and p31(comet). *Proc Natl Acad Sci U S*  
730 *A.* 111:12019-12024.
- 731 Fava, L.L., M. Kaulich, E.A. Nigg, and A. Santamaria. 2011. Probing the in vivo function  
732 of Mad1:C-Mad2 in the spindle assembly checkpoint. *EMBO J.* 30:3322-3336.
- 733 Galli, M., and D.O. Morgan. 2016. Cell Size Determines the Strength of the Spindle  
734 Assembly Checkpoint during Embryonic Development. *Dev Cell.* 36:344-352.
- 735 Gerhold, A.R., V. Poupart, J.C. Labbe, and P.S. Maddox. 2018. Spindle assembly  
736 checkpoint strength is linked to cell fate in the *Caenorhabditis elegans* embryo.  
737 *Mol Biol Cell.* 29:1435-1448.
- 738 Gerhold, A.R., J. Ryan, J.N. Vallee-Trudeau, J.F. Dorn, J.C. Labbe, and P.S. Maddox.  
739 2015. Investigating the regulation of stem and progenitor cell mitotic progression  
740 by in situ imaging. *Curr Biol.* 25:1123-1134.
- 741 Gotta, M., Y. Dong, Y.K. Peterson, S.M. Lanier, and J. Ahringer. 2003. Asymmetrically  
742 distributed *C. elegans* homologs of AGS3/PINS control spindle position in the  
743 early embryo. *Curr Biol.* 13:1029-1037.
- 744 Guo, S., and K.J. Kemphues. 1995. par-1, a gene required for establishing polarity in *C.*  
745 *elegans* embryos, encodes a putative Ser/Thr kinase that is asymmetrically  
746 distributed. *Cell.* 81:611-620.
- 747 Kyogoku, H., and T.S. Kitajima. 2017. Large Cytoplasm Is Linked to the Error-Prone  
748 Nature of Oocytes. *Dev Cell.* 41:287-298 e284.
- 749 Lawrence, K.S., T. Chau, and J. Engebrecht. 2015. DNA damage response and spindle  
750 assembly checkpoint function throughout the cell cycle to ensure genomic  
751 integrity. *PLoS Genet.* 11:e1005150.

- 752 Li, Y., and R. Benezra. 1996. Identification of a human mitotic checkpoint gene:  
753 hsMAD2. *Science*. 274:246-248.
- 754 Luo, X., Z. Tang, J. Rizo, and H. Yu. 2002. The Mad2 spindle checkpoint protein  
755 undergoes similar major conformational changes upon binding to either Mad1 or  
756 Cdc20. *Mol Cell*. 9:59-71.
- 757 Luo, X., Z. Tang, G. Xia, K. Wassmann, T. Matsumoto, J. Rizo, and H. Yu. 2004. The  
758 Mad2 spindle checkpoint protein has two distinct natively folded states. *Nat*  
759 *Struct Mol Biol*. 11:338-345.
- 760 Ma, H.T., and R.Y. Poon. 2016. TRIP13 Regulates Both the Activation and Inactivation  
761 of the Spindle-Assembly Checkpoint. *Cell Rep*. 14:1086-1099.
- 762 Ma, H.T., and R.Y.C. Poon. 2018. TRIP13 Functions in the Establishment of the Spindle  
763 Assembly Checkpoint by Replenishing O-MAD2. *Cell Rep*. 22:1439-1450.
- 764 Maddox, A.S., B. Habermann, A. Desai, and K. Oegema. 2005. Distinct roles for two C.  
765 elegans anillins in the gonad and early embryo. *Development*. 132:2837-2848.
- 766 Mariani, L., E. Chirolì, L. Nezi, H. Muller, S. Piatti, A. Musacchio, and A. Ciliberto. 2012.  
767 Role of the Mad2 dimerization interface in the spindle assembly checkpoint  
768 independent of kinetochores. *Curr Biol*. 22:1900-1908.
- 769 Marks, D.H., R. Thomas, Y. Chin, R. Shah, C. Khoo, and R. Benezra. 2017. Mad2  
770 Overexpression Uncovers a Critical Role for TRIP13 in Mitotic Exit. *Cell Rep*.  
771 19:1832-1845.
- 772 Meraldi, P., V.M. Draviam, and P.K. Sorger. 2004. Timing and checkpoints in the  
773 regulation of mitotic progression. *Dev Cell*. 7:45-60.
- 774 Miniowitz-Shemtov, S., E. Eytan, S. Kaisari, D. Sitry-Shevah, and A. Hershko. 2015.  
775 Mode of interaction of TRIP13 AAA-ATPase with the Mad2-binding protein  
776 p31comet and with mitotic checkpoint complexes. *Proc Natl Acad Sci U S A*.  
777 112:11536-11540.

- 778 Moyle, M.W., T. Kim, N. Hattersley, J. Espeut, D.K. Cheerambathur, K. Oegema, and A.  
779 Desai. 2014. A Bub1-Mad1 interaction targets the Mad1-Mad2 complex to  
780 unattached kinetochores to initiate the spindle checkpoint. *J Cell Biol.* 204:647-  
781 657.
- 782 Nelson, C.R., T. Hwang, P.H. Chen, and N. Bhalla. 2015. TRIP13PCH-2 promotes Mad2  
783 localization to unattached kinetochores in the spindle checkpoint response. *J Cell*  
784 *Biol.* 211:503-516.
- 785 Nezi, L., G. Rancati, A. De Antoni, S. Pasqualato, S. Piatti, and A. Musacchio. 2006.  
786 Accumulation of Mad2-Cdc20 complex during spindle checkpoint activation  
787 requires binding of open and closed conformers of Mad2 in *Saccharomyces*  
788 *cerevisiae*. *J Cell Biol.* 174:39-51.
- 789 Nystul, T.G., J.P. Goldmark, P.A. Padilla, and M.B. Roth. 2003. Suspended animation in  
790 *C. elegans* requires the spindle checkpoint. *Science.* 302:1038-1041.
- 791 O'Connell, K.F., C. Caron, K.R. Kopish, D.D. Hurd, K.J. Kemphues, Y. Li, and J.G.  
792 White. 2001. The *C. elegans* zyg-1 gene encodes a regulator of centrosome  
793 duplication with distinct maternal and paternal roles in the embryo. *Cell.* 105:547-  
794 558.
- 795 O'Rourke, S.M., C. Carter, L. Carter, S.N. Christensen, M.P. Jones, B. Nash, M.H. Price,  
796 D.W. Turnbull, A.R. Garner, D.R. Hamill, V.R. Osterberg, R. Lyczak, E.E.  
797 Madison, M.H. Nguyen, N.A. Sandberg, N. Sedghi, J.H. Willis, J. Yochem, E.A.  
798 Johnson, and B. Bowerman. 2011. A survey of new temperature-sensitive,  
799 embryonic-lethal mutations in *C. elegans*: 24 alleles of thirteen genes. *PLoS*  
800 *One.* 6:e16644.
- 801 Rodriguez-Bravo, V., J. Maciejowski, J. Corona, H.K. Buch, P. Collin, M.T. Kanemaki,  
802 J.V. Shah, and P.V. Jallepalli. 2014. Nuclear pores protect genome integrity by



803 assembling a premitotic and Mad1-dependent anaphase inhibitor. *Cell*.  
804 156:1017-1031.

805 Rose, L., and P. Gonczy. 2014. Polarity establishment, asymmetric division and  
806 segregation of fate determinants in early *C. elegans* embryos. *WormBook*:1-43.

807 Rosenberg, S.C., and K.D. Corbett. 2015. The multifaceted roles of the HORMA domain  
808 in cellular signaling. *J Cell Biol.* 211:745-755.

809 San-Segundo, P.A., and G.S. Roeder. 1999. Pch2 links chromatin silencing to meiotic  
810 checkpoint control. *Cell.* 97:313-324.

811 Seydoux, G., C.C. Mello, J. Pettitt, W.B. Wood, J.R. Priess, and A. Fire. 1996.  
812 Repression of gene expression in the embryonic germ lineage of *C. elegans*.  
813 *Nature.* 382:713-716.

814 Simonetta, M., R. Manzoni, R. Mosca, M. Mapelli, L. Massimiliano, M. Vink, B. Novak, A.  
815 Musacchio, and A. Ciliberto. 2009. The influence of catalysis on mad2 activation  
816 dynamics. *PLoS Biol.* 7:e10.

817 Sironi, L., M. Mapelli, S. Knapp, A. De Antoni, K.T. Jeang, and A. Musacchio. 2002.  
818 Crystal structure of the tetrameric Mad1-Mad2 core complex: implications of a  
819 'safety belt' binding mechanism for the spindle checkpoint. *EMBO J.* 21:2496-  
820 2506.

821 Sironi, L., M. Melixetian, M. Faretta, E. Prosperini, K. Helin, and A. Musacchio. 2001.  
822 Mad2 binding to Mad1 and Cdc20, rather than oligomerization, is required for the  
823 spindle checkpoint. *EMBO J.* 20:6371-6382.

824 Srinivasan, D.G., R.M. Fisk, H. Xu, and S. van den Heuvel. 2003. A complex of LIN-5  
825 and GPR proteins regulates G protein signaling and spindle function in *C*  
826 *elegans*. *Genes Dev.* 17:1225-1239.

- 827 Sudakin, V., G.K. Chan, and T.J. Yen. 2001. Checkpoint inhibition of the APC/C in HeLa  
828 cells is mediated by a complex of BUBR1, BUB3, CDC20, and MAD2. *J Cell Biol.*  
829 154:925-936.
- 830 Tintori, S.C., E. Osborne Nishimura, P. Golden, J.D. Lieb, and B. Goldstein. 2016. A  
831 Transcriptional Lineage of the Early *C. elegans* Embryo. *Dev Cell.* 38:430-444.
- 832 Tipton, A.R., K. Wang, P. Oladimeji, S. Sufi, Z. Gu, and S.T. Liu. 2012. Identification of  
833 novel mitosis regulators through data mining with human centromere/kinetochore  
834 proteins as group queries. *BMC Cell Biol.* 13:15.
- 835 Vader, G. 2015. Pch2(TRIP13): controlling cell division through regulation of HORMA  
836 domains. *Chromosoma.* 124:333-339.
- 837 van Hooff, J.J., E. Tromer, L.M. van Wijk, B. Snel, and G.J. Kops. 2017. Evolutionary  
838 dynamics of the kinetochore network in eukaryotes as revealed by comparative  
839 genomics. *EMBO Rep.*
- 840 Vazquez-Diez, C., L.M.G. Paim, and G. FitzHarris. 2019. Cell-Size-Independent Spindle  
841 Checkpoint Failure Underlies Chromosome Segregation Error in Mouse  
842 Embryos. *Curr Biol.* 29:865-873 e863.
- 843 Vleugel, M., E. Hoogendoorn, B. Snel, and G.J. Kops. 2012. Evolution and function of  
844 the mitotic checkpoint. *Dev Cell.* 23:239-250.
- 845 Wang, K., B. Sturt-Gillespie, J.C. Hittle, D. Macdonald, G.K. Chan, T.J. Yen, and S.T.  
846 Liu. 2014. Thyroid hormone receptor interacting protein 13 (TRIP13) AAA-  
847 ATPase is a novel mitotic checkpoint-silencing protein. *J Biol Chem.* 289:23928-  
848 23937.
- 849 Wu, H.Y., and S.M. Burgess. 2006. Two distinct surveillance mechanisms monitor  
850 meiotic chromosome metabolism in budding yeast. *Curr Biol.* 16:2473-2479.

851 Ye, Q., S.C. Rosenberg, A. Moeller, J.A. Speir, T.Y. Su, and K.D. Corbett. 2015. TRIP13  
852 is a protein-remodeling AAA+ ATPase that catalyzes MAD2 conformation  
853 switching. *eLife*. 4.

854 Yost, S., B. de Wolf, S. Hanks, A. Zachariou, C. Marcozzi, M. Clarke, R.M. de Voer, B.  
855 Etemad, E. Ujttewaal, E. Ramsay, H. Wylie, A. Elliott, S. Picton, A. Smith, S.  
856 Smithson, S. Seal, E. Ruark, G. Houge, J. Pines, G. Kops, and N. Rahman.  
857 2017. Biallelic TRIP13 mutations predispose to Wilms tumor and chromosome  
858 missegregation. *Nat Genet*.

859

860 **Figure Legends**

861

862 **Figure 1: PCH-2 becomes dispensable for the spindle checkpoint response in**  
863 **somatic cells experimentally reduced in size**

864 (A) Images of control and *ani-2<sup>RNAi</sup>* two-cell embryos. Scale bar indicates 5  $\mu\text{m}$ . (B)  
865 Cartoon of embryos treated with *zyg-1<sup>RNAi</sup>* or *ani-2<sup>RNAi</sup>;zyg-1<sup>RNAi</sup>*. (C) Mitotic timing, as  
866 measured from nuclear envelope breakdown (NEBD) to the onset of cortical contractility  
867 (OCC), in AB cells of control, *pch-2* and *mad-1* mutant embryos plotted against cell  
868 volume. Lines represent regression analysis for each set of data. (D) Data from (C)  
869 partitioned into three categories: wild-type sized embryos (more than  $5 \times 10^3 \mu\text{m}^3$ ),  
870 medium sized embryos (between  $3.5 \times 10^3 \mu\text{m}^3$  and  $5 \times 10^3 \mu\text{m}^3$ ) and small embryos  
871 (less than  $3.5 \times 10^3 \mu\text{m}^3$ ). Error bars are S.E.M. In all graphs, a \* indicates a p value <  
872 0.05, \*\* indicates a p value < 0.01 and \*\*\* a p value < 0.0001.

873

874 **Figure 2: PCH-2 becomes dispensable for MAD-2 recruitment at unattached**  
875 **kinetochores in somatic cells experimentally reduced in size**

876 (A) Cartoon and images of GFP::MAD-2 recruitment to unattached kinetochores in AB  
877 cells of small and wild-type sized embryos. Scale bar indicates 1  $\mu\text{m}$ . (B) Quantification  
878 of kinetochore bound GFP::MAD-2. Error bars are S.E.M.

879

880 **Figure 3: MAD-2 dosage controls checkpoint strength**

881 (A) Immunostaining of MAD-2 and nuclear pore complex components (NPCs) shows  
882 MAD-2 localized in the nucleus and at the nuclear envelope during interphase. Scale bar  
883 indicates 5  $\mu\text{m}$ . (B) Model depicting how a decrease cell volume might result in an  
884 increase in the local concentration of O-Mad2 in *ani-2<sup>RNAi</sup>;zyg-1<sup>RNAi</sup>* embryos, in contrast  
885 to *zyg-1<sup>RNAi</sup>* embryos. (C) Mitotic timing, as measured from nuclear envelope breakdown

886 (NEBD) to the onset of cortical contractility (OCC), in AB cells of control and *mad-2*/<sup>+</sup>  
887 mutant embryos plotted against cell volume. Lines represent regression analysis for  
888 each set of data.

889

890 **Figure 4: PCH-2 is required for the spindle checkpoint response during**  
891 **embryogenesis**

892 (A) Mitotic timing, as measured from nuclear envelope breakdown (NEBD) to  
893 decondensation of chromatin (DECON), in control, *pch-2* and *san-1* mutant embryos  
894 treated with nocodazole at different developmental stages (4- and 16-cell embryos). (B)  
895 Mitotic timing in control and *pch-2* mutant embryos overexpressing GFP::MAD-2 and  
896 treated with nocodazole at different developmental stages (4- and 16-cell embryos). (C)  
897 Mitotic timing in *zyg-1<sup>ts</sup>* and *pch-2;zyg-1<sup>ts</sup>* mutant embryos at different developmental  
898 stages (2-, 4- and 8-cell embryos). All error bars are S.E.M.

899

900 **Figure 5: PCH-2 is responsible for the stronger spindle checkpoint in the germline**  
901 **lineage**

902 Mitotic timing, as measured from nuclear envelope breakdown (NEBD) to the onset of  
903 cortical contractility (OCC), in AB and P<sub>1</sub> cells plotted against cell volume in control *ani-2<sup>RNAi</sup>;zyg-1<sup>RNAi</sup>*  
904 embryos (A) or *pch-2;ani-2<sup>RNAi</sup>;zyg-1<sup>RNAi</sup>* (B) embryos. Lines represent  
905 regression analysis for each set of data. Data for AB cells in both control and *pch-2*  
906 mutants is the same as in Figure 1C. (C) Mitotic timing of AB and P<sub>1</sub> cells in control, *pch-2*  
907 and *mad-1* mutants during unperturbed divisions. Error bars are S.E.M.

908

909 **Figure 6: PCH-2's enrichment in P<sub>1</sub> cells depends on PAR-1**

910 (A) Mitotic timing of control embryos and embryos expressing PCH-2::GFP during  
911 unperturbed divisions or in the presence of monopolar spindles. (B) Cartoon and images

912 of PCH-2::GFP localization around mitotic chromosomes in AB and P<sub>1</sub> cells of two-cell  
913 embryos. Scale bar indicates 5 μm. (C) Quantification of PCH-2::GFP fluorescence in  
914 AB and P<sub>1</sub> cells. (D) Cartoon and images of PCH-2::GFP localization around mitotic  
915 chromosomes in AB and P<sub>1</sub> cells of control RNAi and *par-1<sup>RNAi</sup>* two-cell embryos. (E)  
916 Quantification of PCH-2::GFP fluorescence in AB and P<sub>1</sub> cells of *par-1<sup>RNAi</sup>* embryos. All  
917 error bars are S.E.M. NS indicates not significant.

918

919 **Figure 7: The stronger checkpoint in P<sub>1</sub> cells depends on CMT-1**

920 (A) Mitotic timing, as measured from nuclear envelope breakdown (NEBD) to the onset  
921 of cortical contractility (OCC), in AB and P<sub>1</sub> cells plotted against cell volume in *cmt-1;ani-*  
922 *2<sup>RNAi</sup>;zyg-1<sup>RNAi</sup>* embryos. Lines represent regression analysis for each set of data. (B)  
923 Mitotic timing of control, *cmt-1* and *mad-1* mutant embryos during unperturbed divisions  
924 or in the presence of monopolar spindles. (C) Cartoon and images of PCH-2::GFP  
925 localization around mitotic chromosomes in AB and P<sub>1</sub> cells of *cmt-1* mutant embryos.  
926 Scale bar indicates 5 μm. (D) Quantification of PCH-2::GFP fluorescence in AB cells of  
927 control and *cmt-1* mutant embryos. (E) Quantification of PCH-2::GFP fluorescence in AB  
928 and P<sub>1</sub> cells of *cmt-1* mutant embryos. All error bars are S.E.M. NS indicates not  
929 significant.

930

931 **Figure 8: Model**

932 (A) A robust spindle checkpoint response in large cells requires the presence of PCH-2  
933 at unattached kinetochores to increase the local concentration O-MAD-2 at and near  
934 unattached kinetochores. (B) Reducing cell volume of two-cell embryos increases the  
935 concentration of O-Mad-2 at and near unattached kinetochores, allowing a checkpoint  
936 response in the absence of PCH-2. (C) The enrichment of PCH-2 around mitotic

937 chromosomes in P<sub>1</sub> cells results in a higher production of O-MAD-2, generating a  
938 stronger spindle checkpoint response in these cells.

939

940 **Figure S1: Related to Figure 1. The mitotic delay observed in *pch-2;ani-2<sup>RNAi</sup>;zyg-1<sup>RNAi</sup>***  
941 ***1<sup>RNAi</sup>* small cells is a spindle checkpoint response.**

942 Cartoon of control and *ani-2<sup>RNAi</sup>* two-cell embryos (A) and an *ani-2<sup>RNAi</sup>;zyg-1<sup>RNAi</sup>* two-cell  
943 embryo (B). Mitotic timing in AB cells plotted against cell volume, during unperturbed  
944 mitosis (C) and in the presence of monopolar spindles. (D). Lines represent regression  
945 analysis for each set of data. The regression line of *pch-2;ani-2<sup>RNAi</sup>;zyg-1<sup>RNAi</sup>* embryos  
946 from Figure 1C is indicated by the opaque red line for comparison.

947

948 **Figure S2: Related to Figure 2: GFP::*MAD-2* decreases at unattached kinetochores**  
949 **in the AB cells of small *ani-2<sup>RNAi</sup>;zyg-1<sup>RNAi</sup>* embryos, unlike in *pch-2;ani-2<sup>RNAi</sup>;zyg-1<sup>RNAi</sup>***  
950 ***1<sup>RNAi</sup>* embryos.**

951 (A) Quantification of GFP::*MAD-2* fluorescence at unattached kinetochores plotted  
952 against cell volume in AB cells of control and *pch-2* embryos. Lines represent regression  
953 analysis for each set of data. (B) Quantification of GFP::*MAD-2* fluorescence around  
954 mitotic chromosomes in AB cells of control and *pch-2* embryos plotted against cell  
955 volume. (C) Images of *MAD-2::GFP* in AB cells of control *ani-2<sup>RNAi</sup>;zyg-1<sup>RNAi</sup>* embryos or  
956 *pch-2;ani-2<sup>RNAi</sup>;zyg-1<sup>RNAi</sup>* embryos. Scale bar indicates 5  $\mu$ m.

957

958 **Figure S3: Related to Figure 3. Nuclear volume does not scale with cell volume in**  
959 ***ani-2<sup>RNAi</sup>* two-cell embryos.**

960 (A) Images of a large (top) and small (bottom) AB cell of *ani-2<sup>RNAi</sup>* embryos. The nuclear  
961 area is indicated with a dashed yellow line. Scale bar indicates 5  $\mu$ m. (B) Nuclear area  
962 plotted against cell volume.

963

964 **Figure S4: Related to Figure 5. PCH-2 is responsible for the stronger spindle**  
965 **checkpoint in the germline lineage.**

966 (A) Mitotic timing of control and *pch-2* mutant embryos during unperturbed divisions or in  
967 the presence of monopolar spindles. Data for control embryos is the same as Figure 7B.

968 (B) Mitotic timing, as measured from nuclear envelope breakdown (NEBD) to the onset  
969 of cortical contractility (OCC), in AB and P<sub>1</sub> cells plotted against cell volume in control  
970 *ani-2<sup>RNAi</sup>;zyg-1<sup>RNAi</sup>* embryos or *pch-2;ani-2<sup>RNAi</sup>;zyg-1<sup>RNAi</sup>* embryos. Lines represent  
971 regression analysis for each set of data.

972

973 **Figure S5: Related to Figure 6. There is no difference in the amount of PCH-2::GFP**  
974 **or GFP::MAD-2 recruited to unattached kinetochores in AB and P<sub>1</sub> cells.**

975 (A) Cartoon and images of PCH-2::GFP recruitment to unattached kinetochores in AB  
976 and P<sub>1</sub> cells of two-cell embryos. Scale bar indicates 1 μm. (B) Quantification of PCH-  
977 2::GFP recruitment at unattached kinetochores in AB and P<sub>1</sub> cells. (C) Cartoon and  
978 images of GFP::MAD-2 recruitment to unattached kinetochores in AB and P<sub>1</sub> cells of  
979 two-cell embryos. Scale bar indicates 1 μm. (D) Quantification of GFP::MAD-2  
980 fluorescence at unattached kinetochores in AB and P<sub>1</sub> cells. All error bars are S.E.M. NS  
981 indicates not significant.

982

983 **Figure S6: Related to Figure 6. There is no difference in the amount of PCH-2::GFP**  
984 **in the cytoplasm of AB and P<sub>1</sub> cells.**

985 (A) Images of AB (left) and P<sub>1</sub> (right) cells after NEBD. Scale bar indicate 5 μm. (B)  
986 Quantification of PCH-2::GFP fluorescence in the cytoplasm of AB and P<sub>1</sub> cells. Error  
987 bars are S.E.M. NS indicates not significant.

988



989 **Figure S7: Related to Figure 6. PCH-2's enrichment in P<sub>1</sub> cells depends on GPR-**  
990 **1/2.** (A) Images of two cell embryos treated with control RNAi or RNAi against *gpr-1* and  
991 *gpr-2*. (B) Cartoon and images of PCH-2::GFP localization around mitotic chromosomes  
992 in AB and P<sub>1</sub> cells of control RNAi and *gpr-1/2*<sup>RNAi</sup> two-cell embryos. Scale bars indicate  
993 5 μm. (C) Quantification of PCH-2::GFP fluorescence in AB and P<sub>1</sub> cells of *gpr-1/2*<sup>RNAi</sup>  
994 embryos. Error bars are S.E.M.

995

## 996 **Movie legends**

997

### 998 **Video 1**

999 Mitosis in the AB cell of a wild-type sized control two-cell embryo with monopolar  
1000 spindles expressing GFH::PH and mCherry::H2B for visualization of the plasma  
1001 membrane and the chromosomes, respectively (strain OD95). The timer starts at NEBD.

1002

### 1003 **Video 2**

1004 Mitosis in the AB cell of a small control two-cell embryo with monopolar spindles  
1005 expressing GFH::PH and mCherry::H2B for visualization of the plasma membrane and  
1006 the chromosomes, respectively (strain OD95). The timer starts at NEBD.

1007

### 1008 **Video 3**

1009 Mitosis in the AB cell of a wild-type sized *pch-2(tm1458)* two-cell embryo with monopolar  
1010 spindles expressing GFH::PH and mCherry::H2B for visualization of the plasma  
1011 membrane and the chromosomes, respectively (strain BHL575). The timer starts at

1012 NEBD.

1013

### 1014 **Video 4**

1015 Mitosis in the AB cell of a small *pch-2(tm1458)* two-cell embryo with monopolar spindles  
1016 expressing GFH::PH and mCherry::H2B for visualization of the plasma membrane and  
1017 the chromosomes, respectively (strain BHL575). The timer starts at NEBD.

1018

1019 **Video 5**

1020 Mitosis in the P<sub>1</sub> cell of a wild-type sized control two-cell embryo with monopolar spindles  
1021 expressing GFH::PH and mCherry::H2B for visualization of the plasma membrane and  
1022 the chromosomes, respectively (strain OD95). The timer starts at NEBD.

1023

1024 **Video 6**

1025 Mitosis in the P<sub>1</sub> cell of a small control two-cell embryo with monopolar spindles  
1026 expressing GFH::PH and mCherry::H2B for visualization of the plasma membrane and  
1027 the chromosomes, respectively (strain OD95). The timer starts at NEBD.

1028

1029 **Video 7**

1030 Mitosis in the P<sub>1</sub> cell of a wild-type sized *pch-2(tm1458)* two-cell embryo with monopolar  
1031 spindles expressing GFH::PH and mCherry::H2B for visualization of the plasma  
1032 membrane and the chromosomes, respectively (strain BHL575). The timer starts at  
1033 NEBD.

1034

1035 **Video 8**

1036 Mitosis in the P<sub>1</sub> cell of a small *pch-2(tm1458)* two-cell embryo with monopolar spindles  
1037 expressing GFH::PH and mCherry::H2B for visualization of the plasma membrane and  
1038 the chromosomes, respectively (strain BHL575). The timer starts at NEBD.

1039

1040 **Video 9**

1041 Mitosis in the AB cell of a wild-type sized *cmt-1(ok2879)* two-cell embryo with monopolar  
1042 spindles expressing GFH::PH and mCherry::H2B for visualization of the plasma  
1043 membrane and the chromosomes, respectively (strain BHL608). The timer starts at  
1044 NEBD.

1045

1046 **Video 10**

1047 Mitosis in the AB cell of a small *cmt-1(ok2879)* two-cell embryo with monopolar spindles  
1048 expressing GFH::PH and mCherry::H2B for visualization of the plasma membrane and  
1049 the chromosomes, respectively (strain BHL608). The timer starts at NEBD.

1050

1051 **Video 11**

1052 Mitosis in the P<sub>1</sub> cell of a wild-type sized *cmt-1(ok2879)* two-cell embryo with monopolar  
1053 spindles expressing GFH::PH and mCherry::H2B for visualization of the plasma  
1054 membrane and the chromosomes, respectively (strain BHL608). The timer starts at  
1055 NEBD.

1056

1057 **Video 12**

1058 Mitosis in the P<sub>1</sub> cell of a small *cmt-1(ok2879)* two-cell embryo with monopolar spindles  
1059 expressing GFH::PH and mCherry::H2B for visualization of the plasma membrane and  
1060 the chromosomes, respectively (strain BHL608). The timer starts at NEBD.

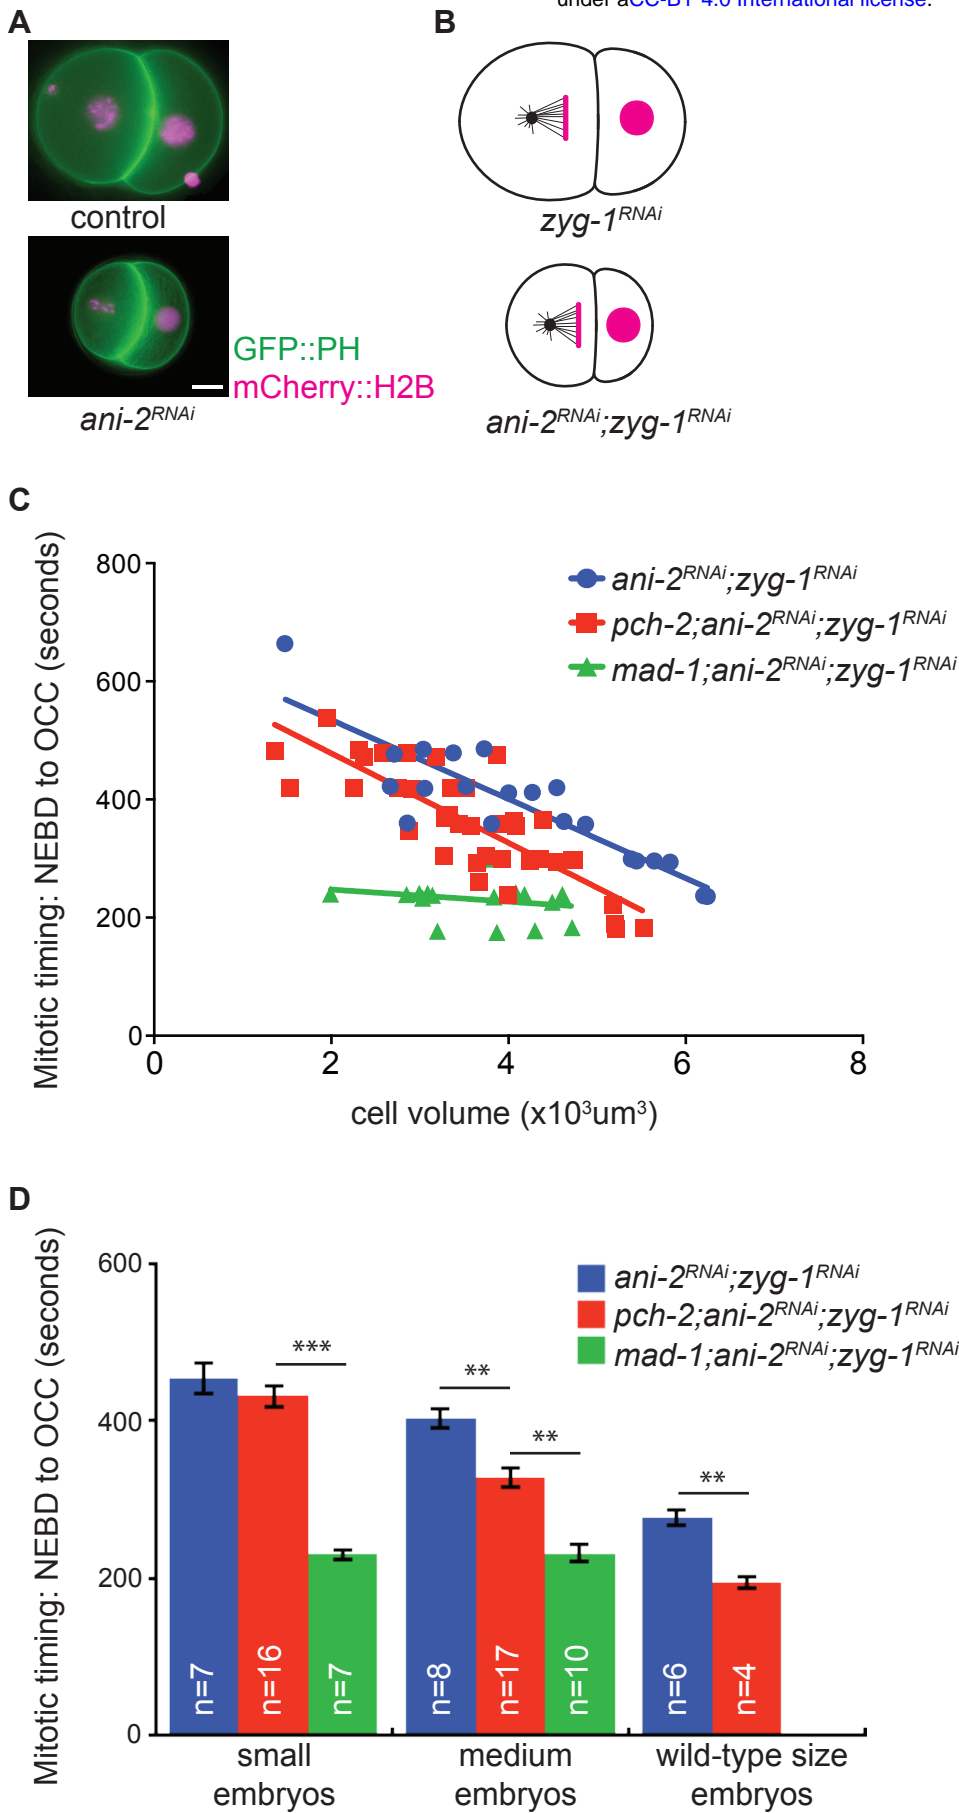

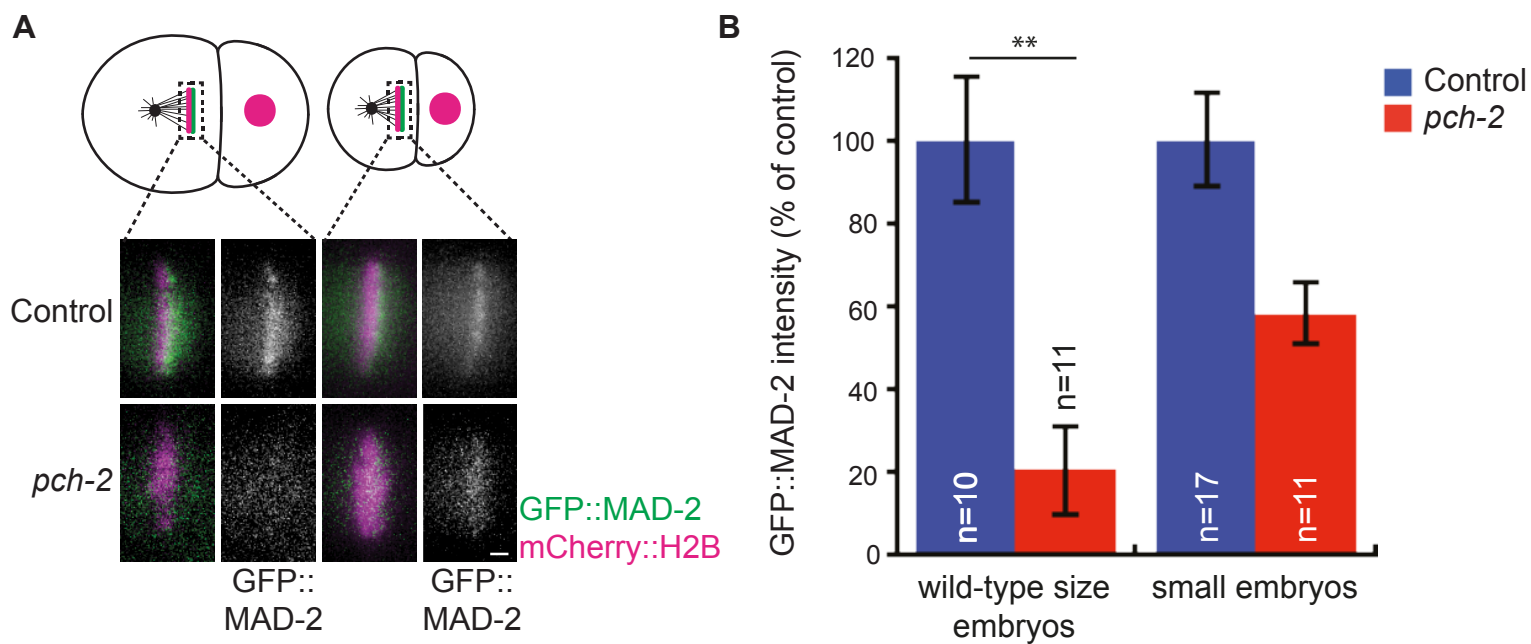

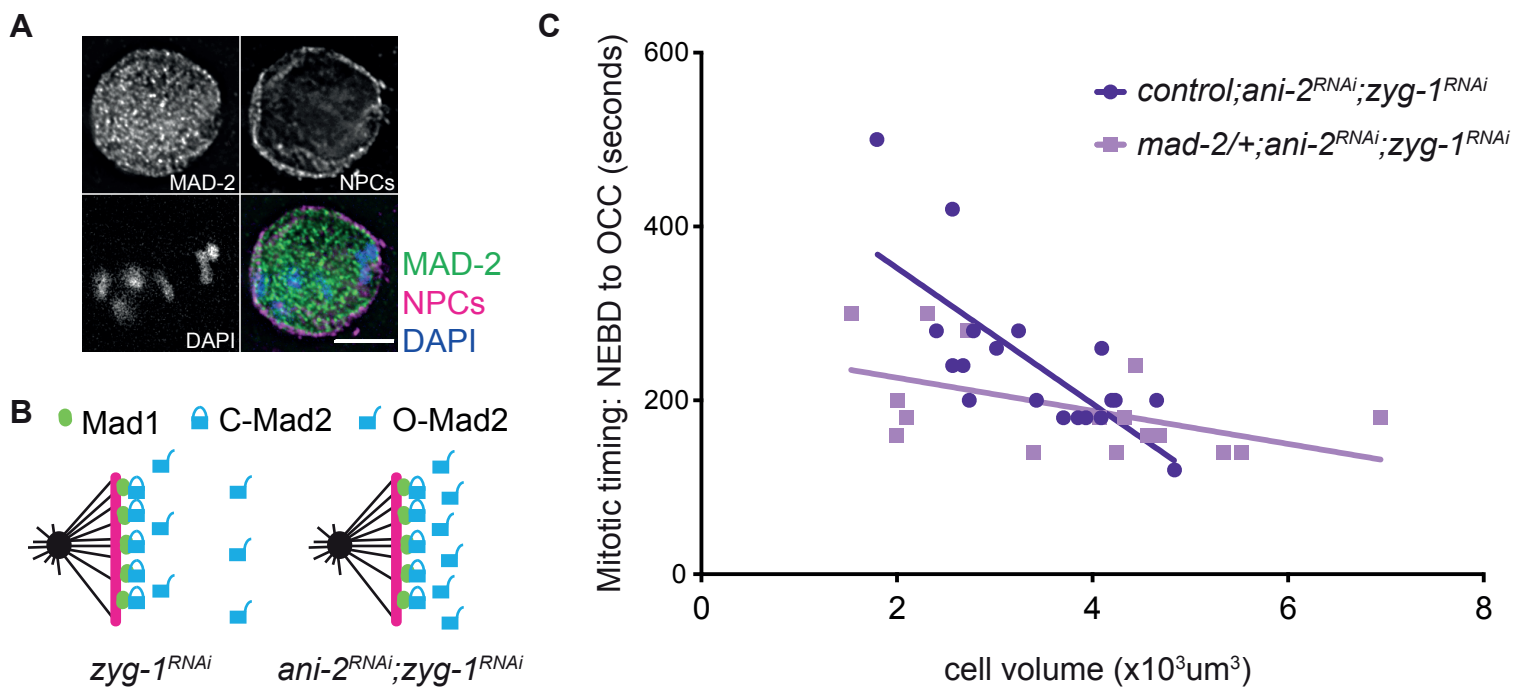

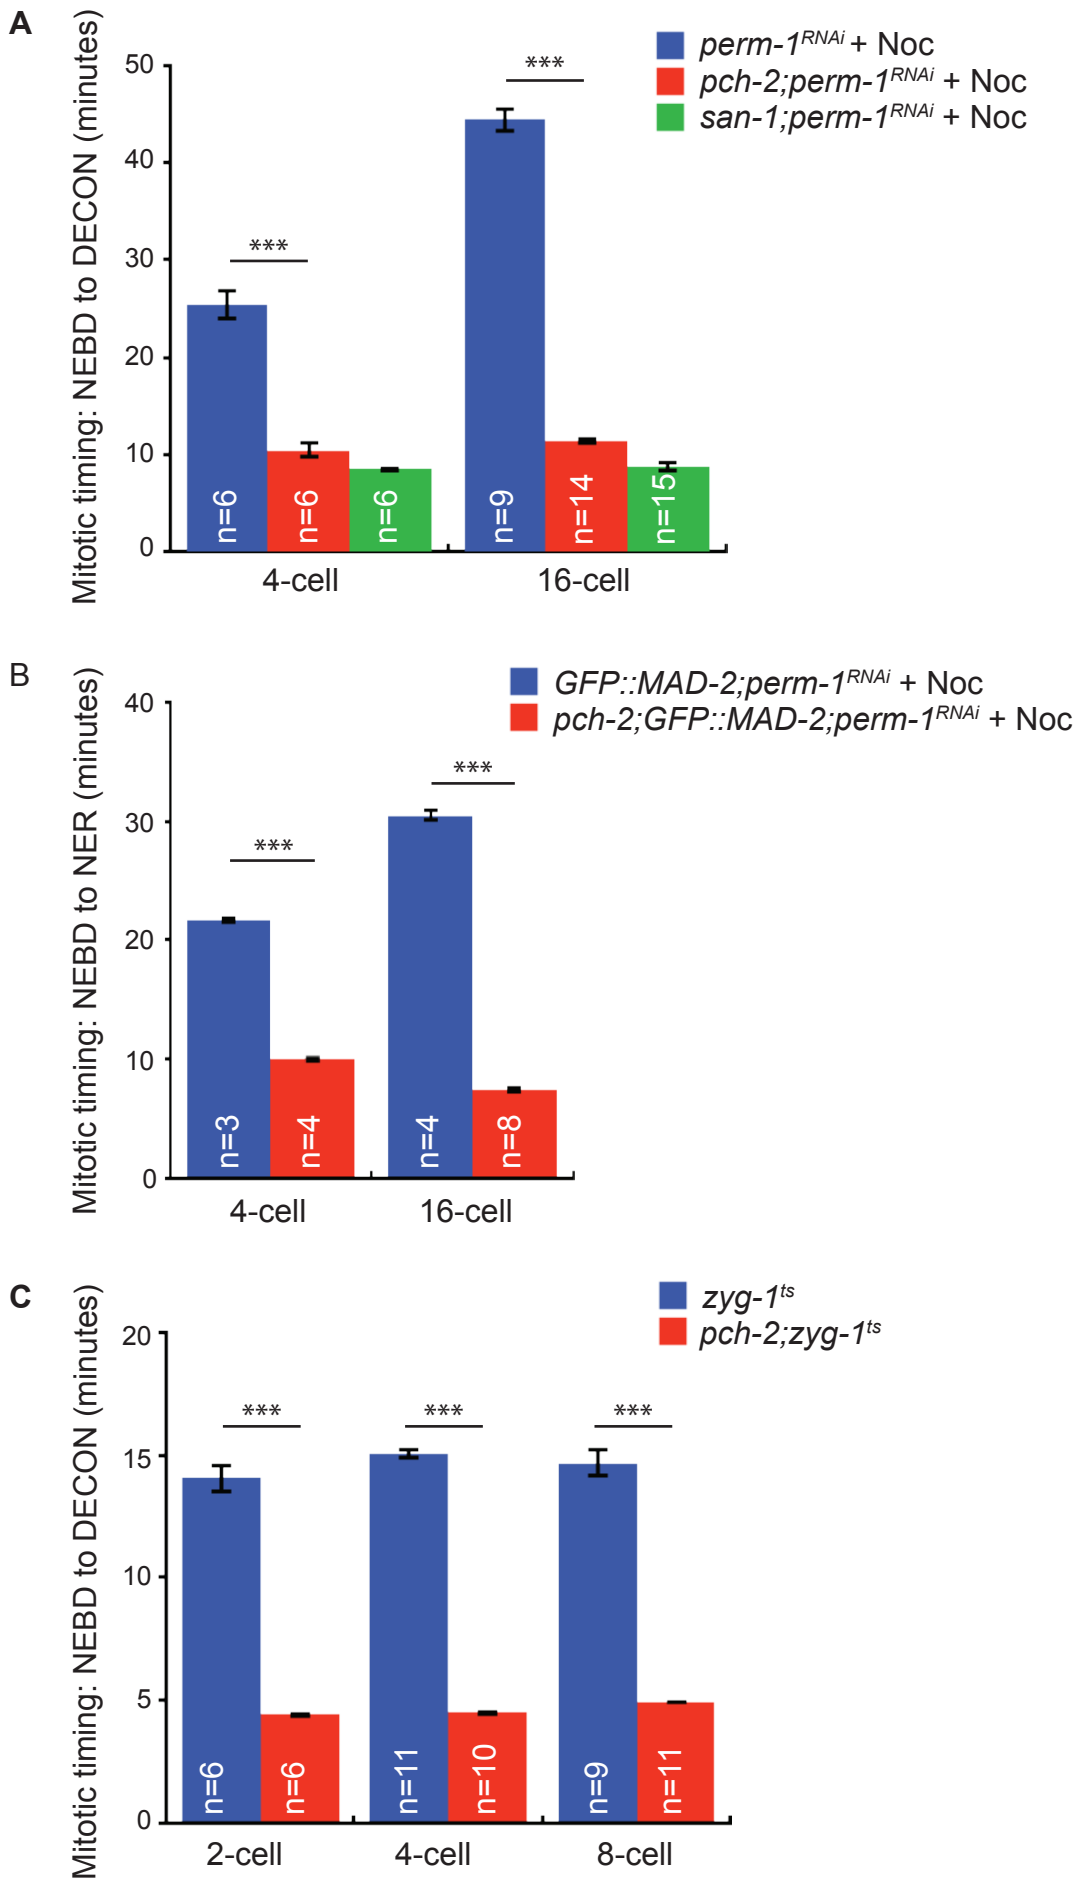

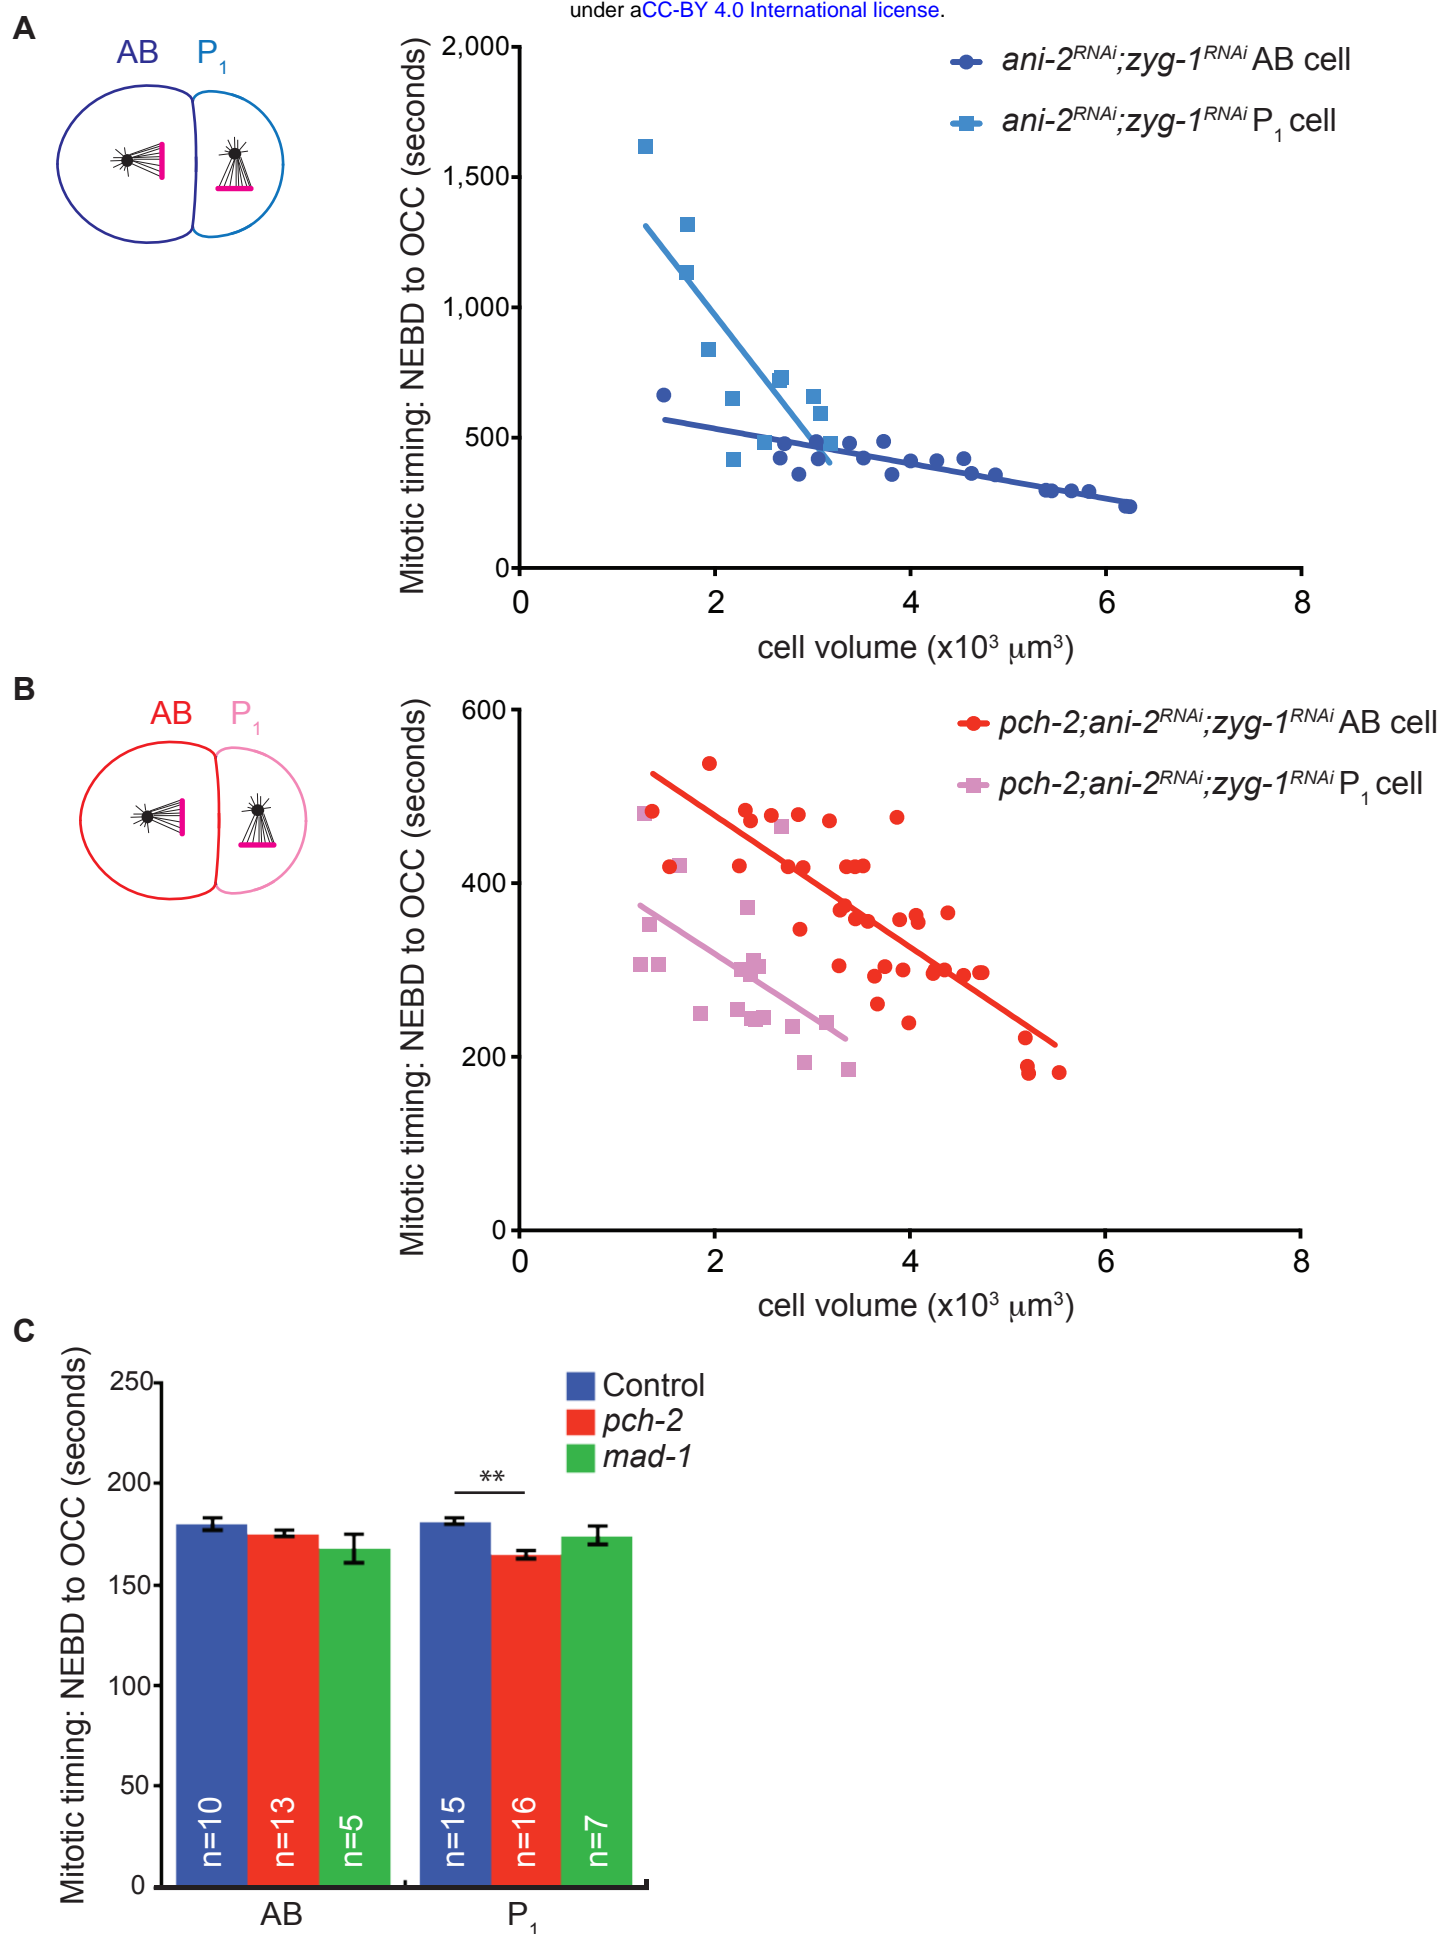



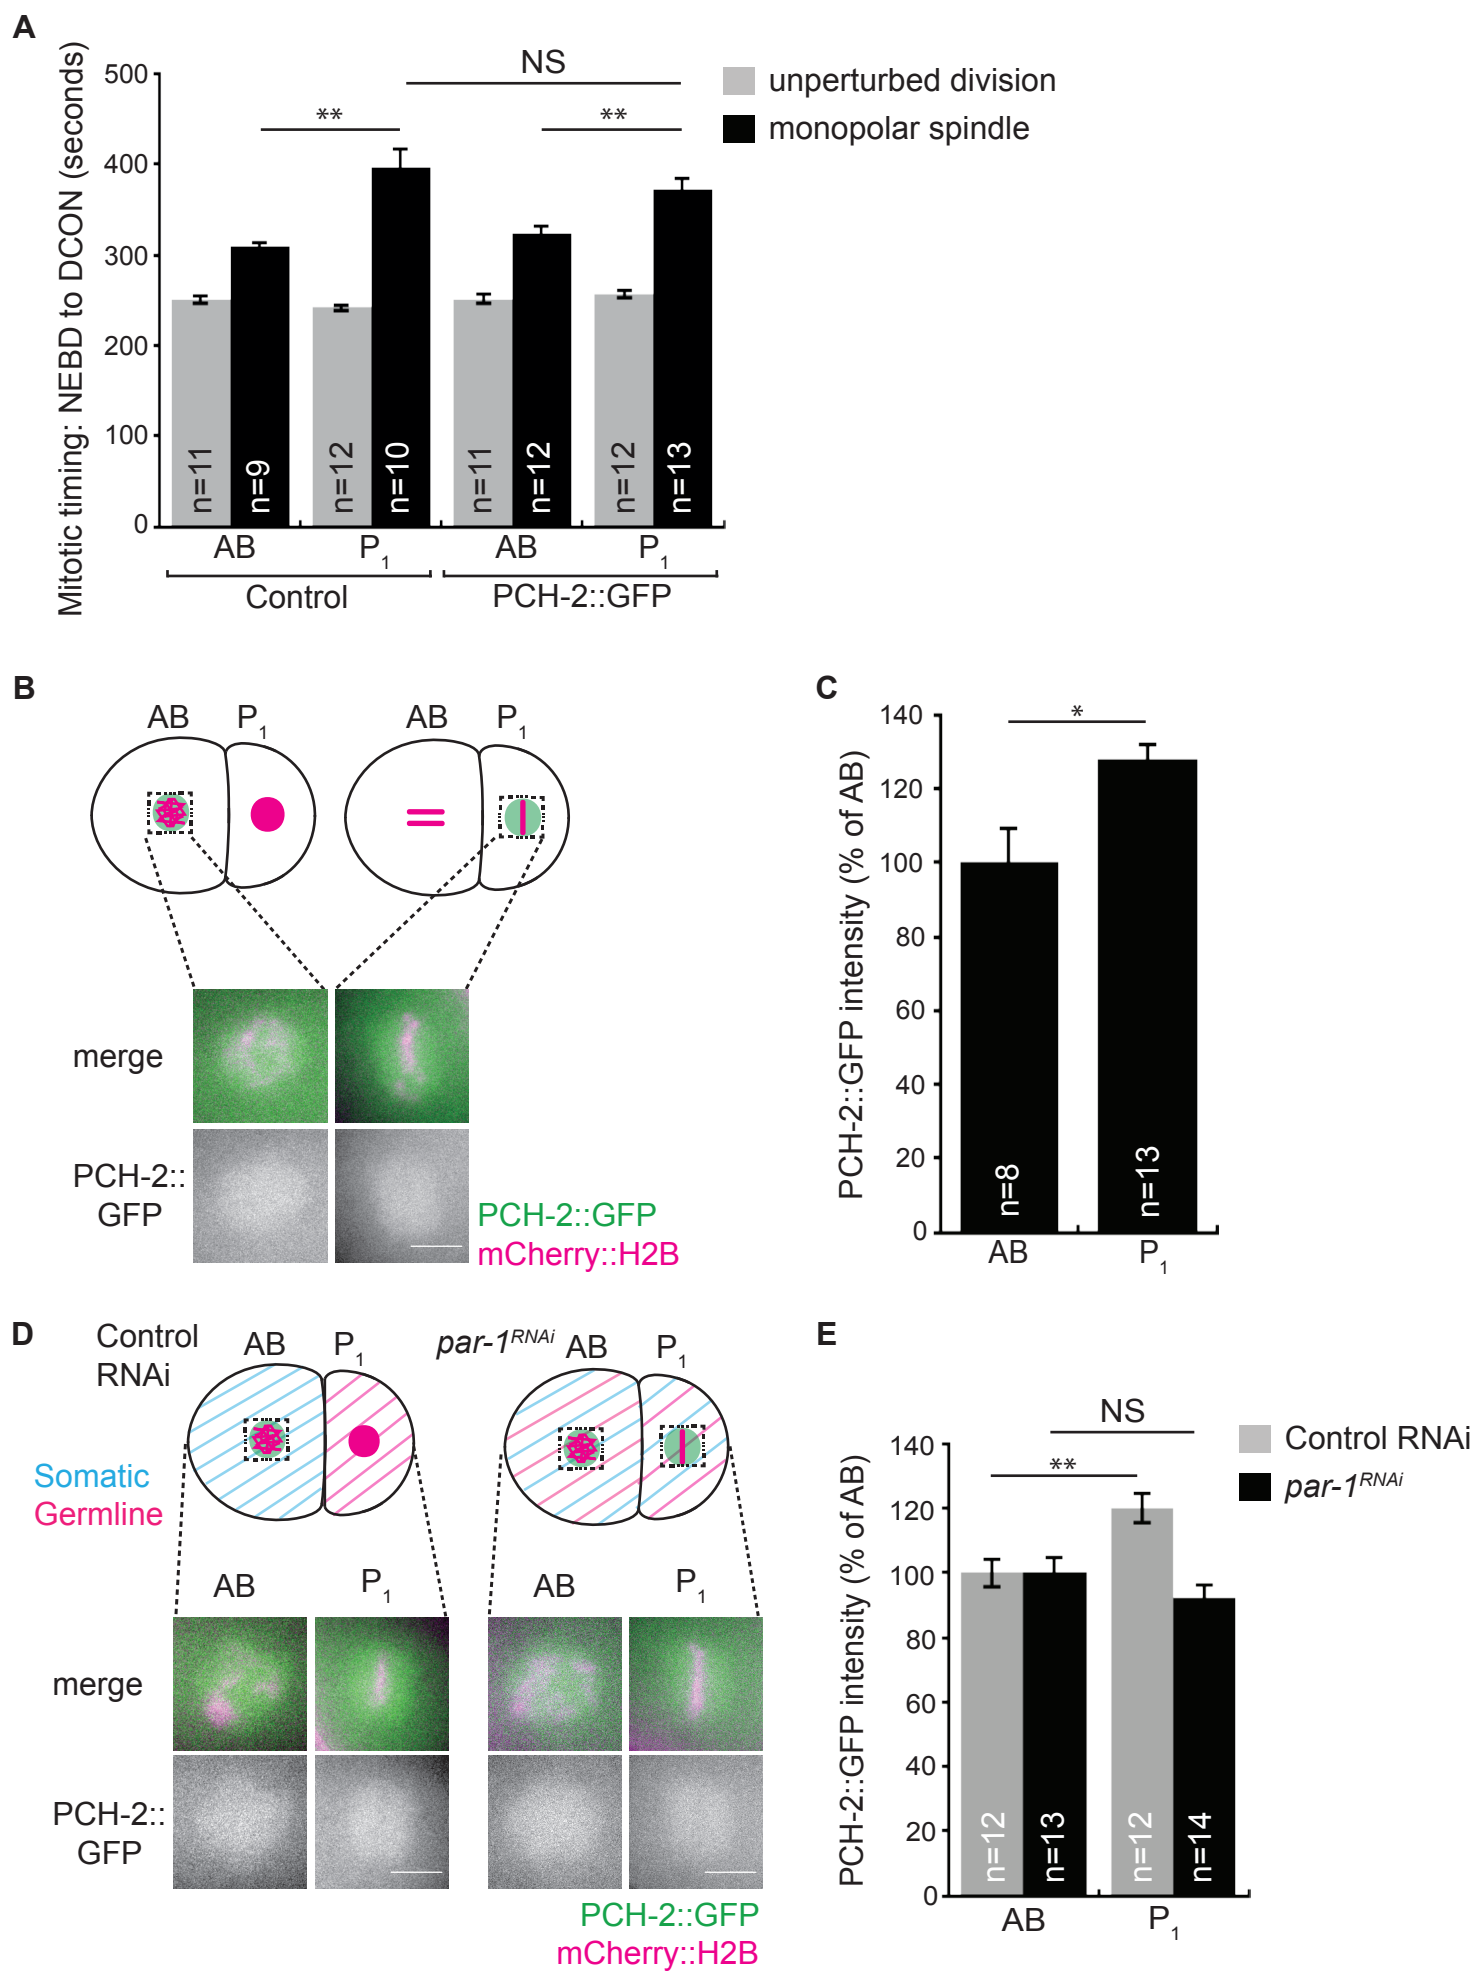

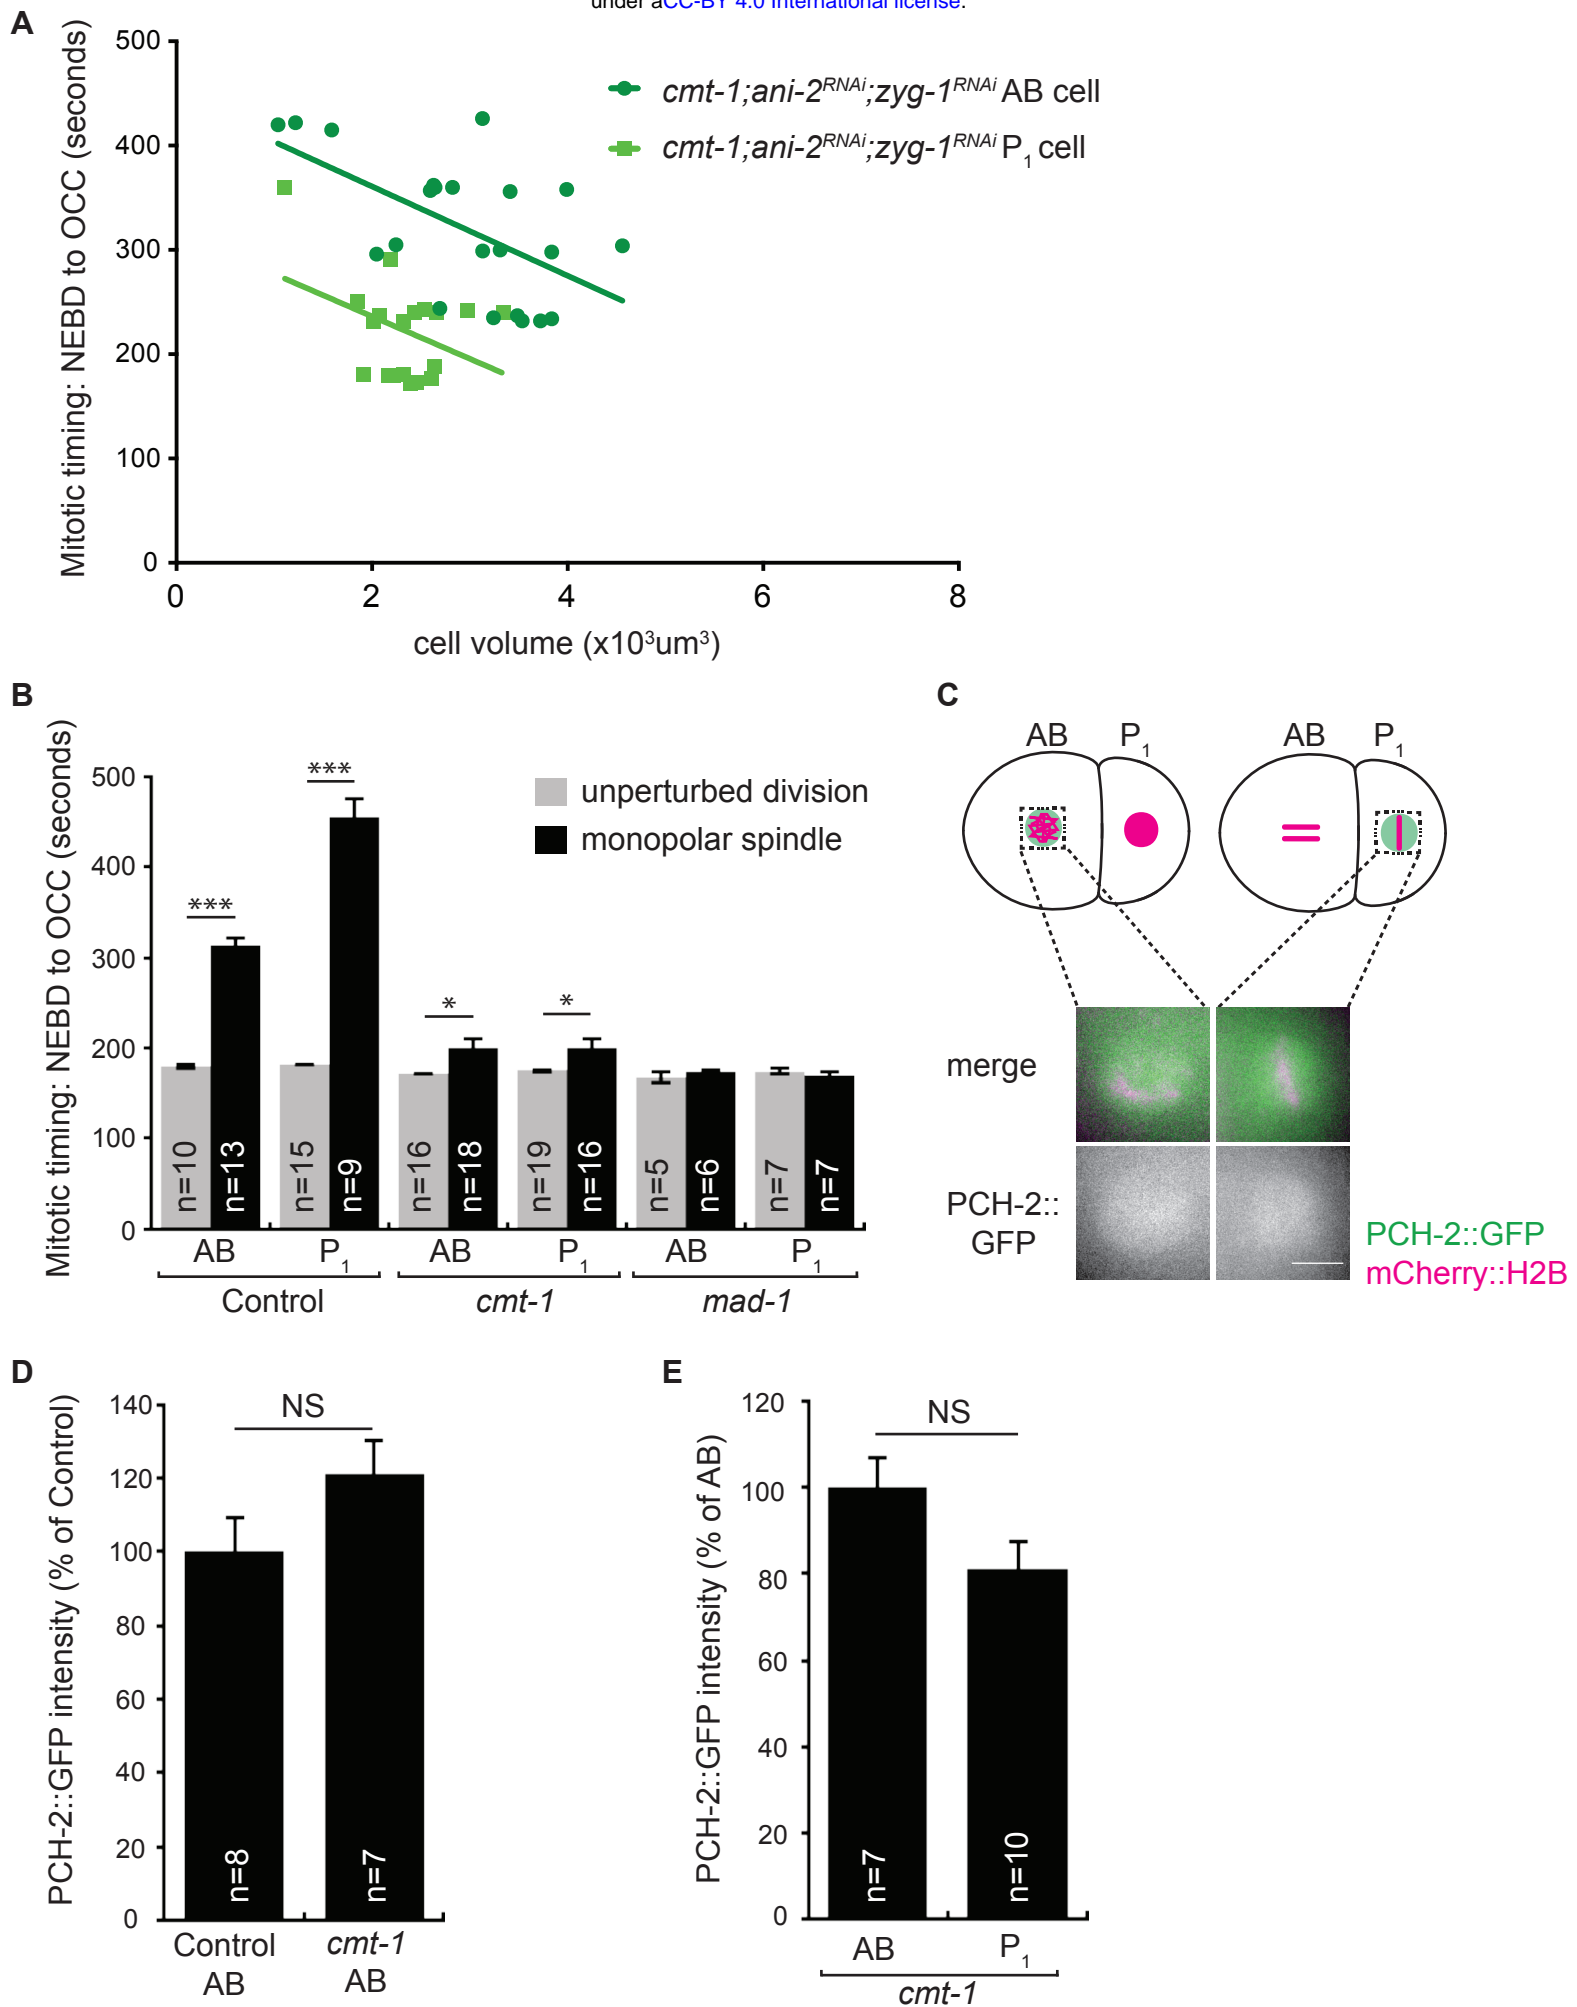

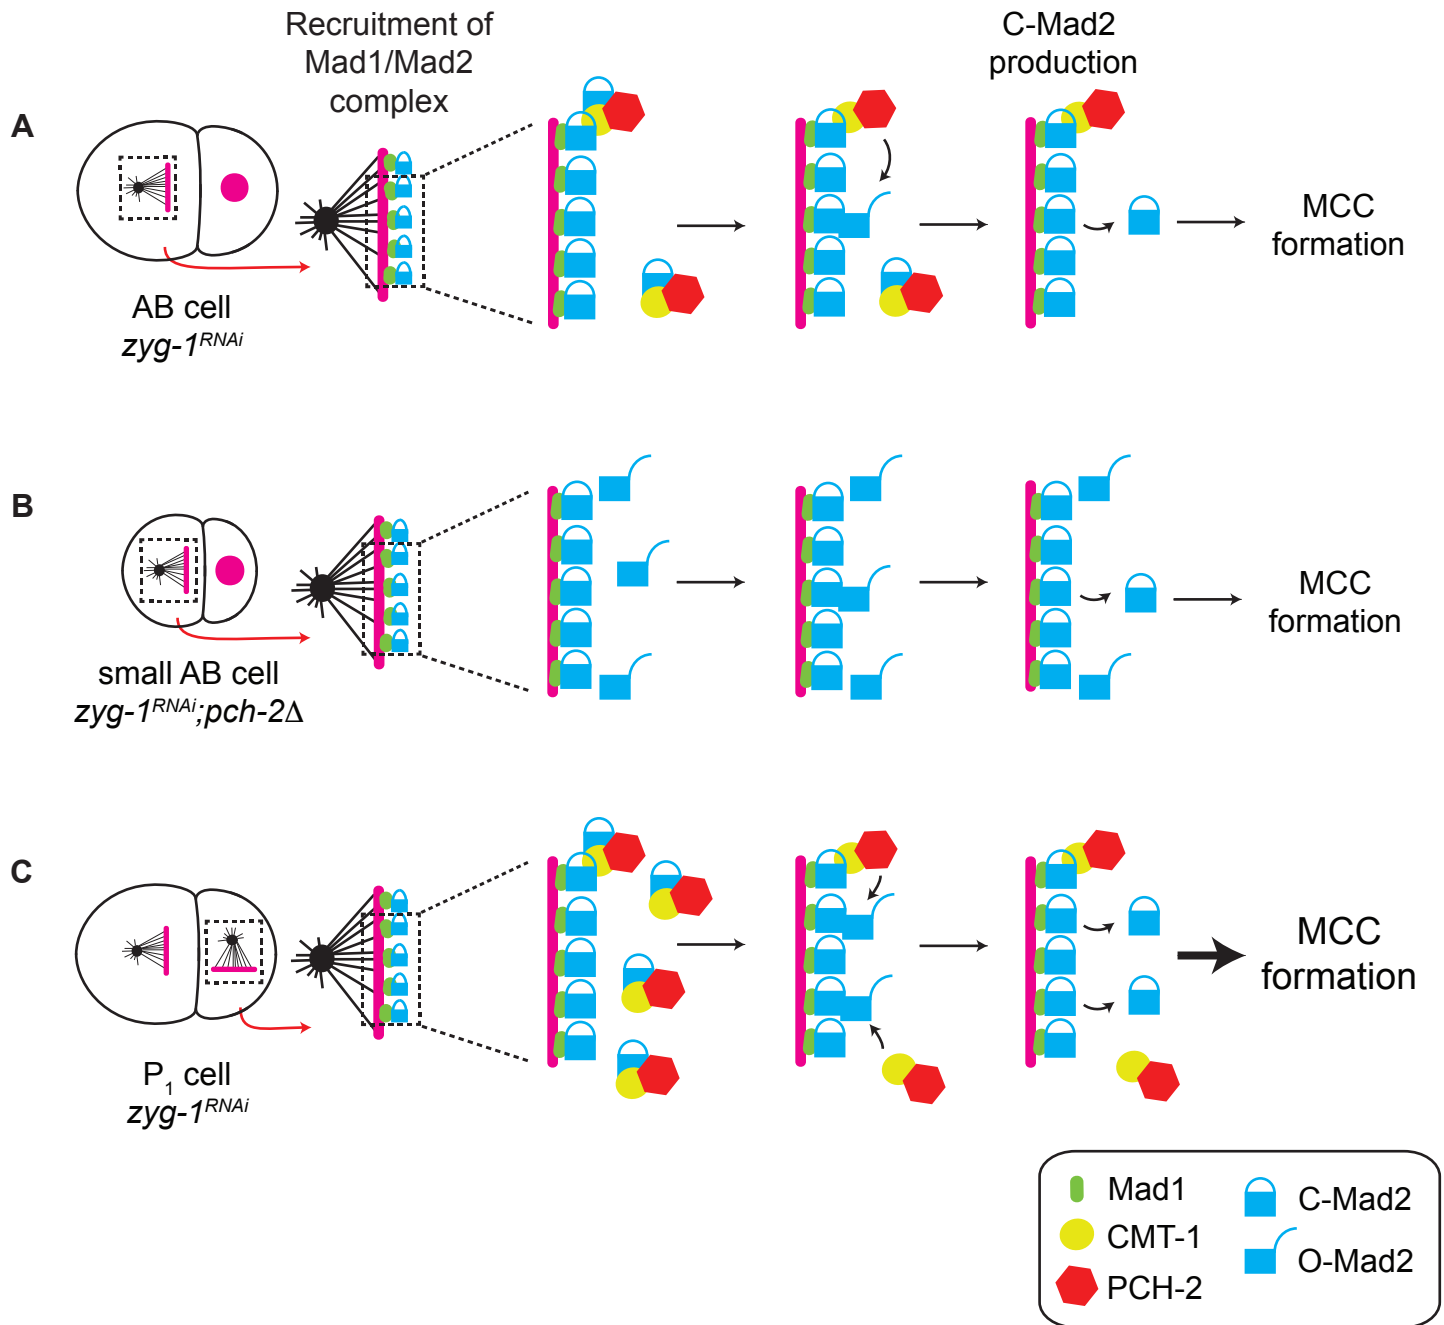

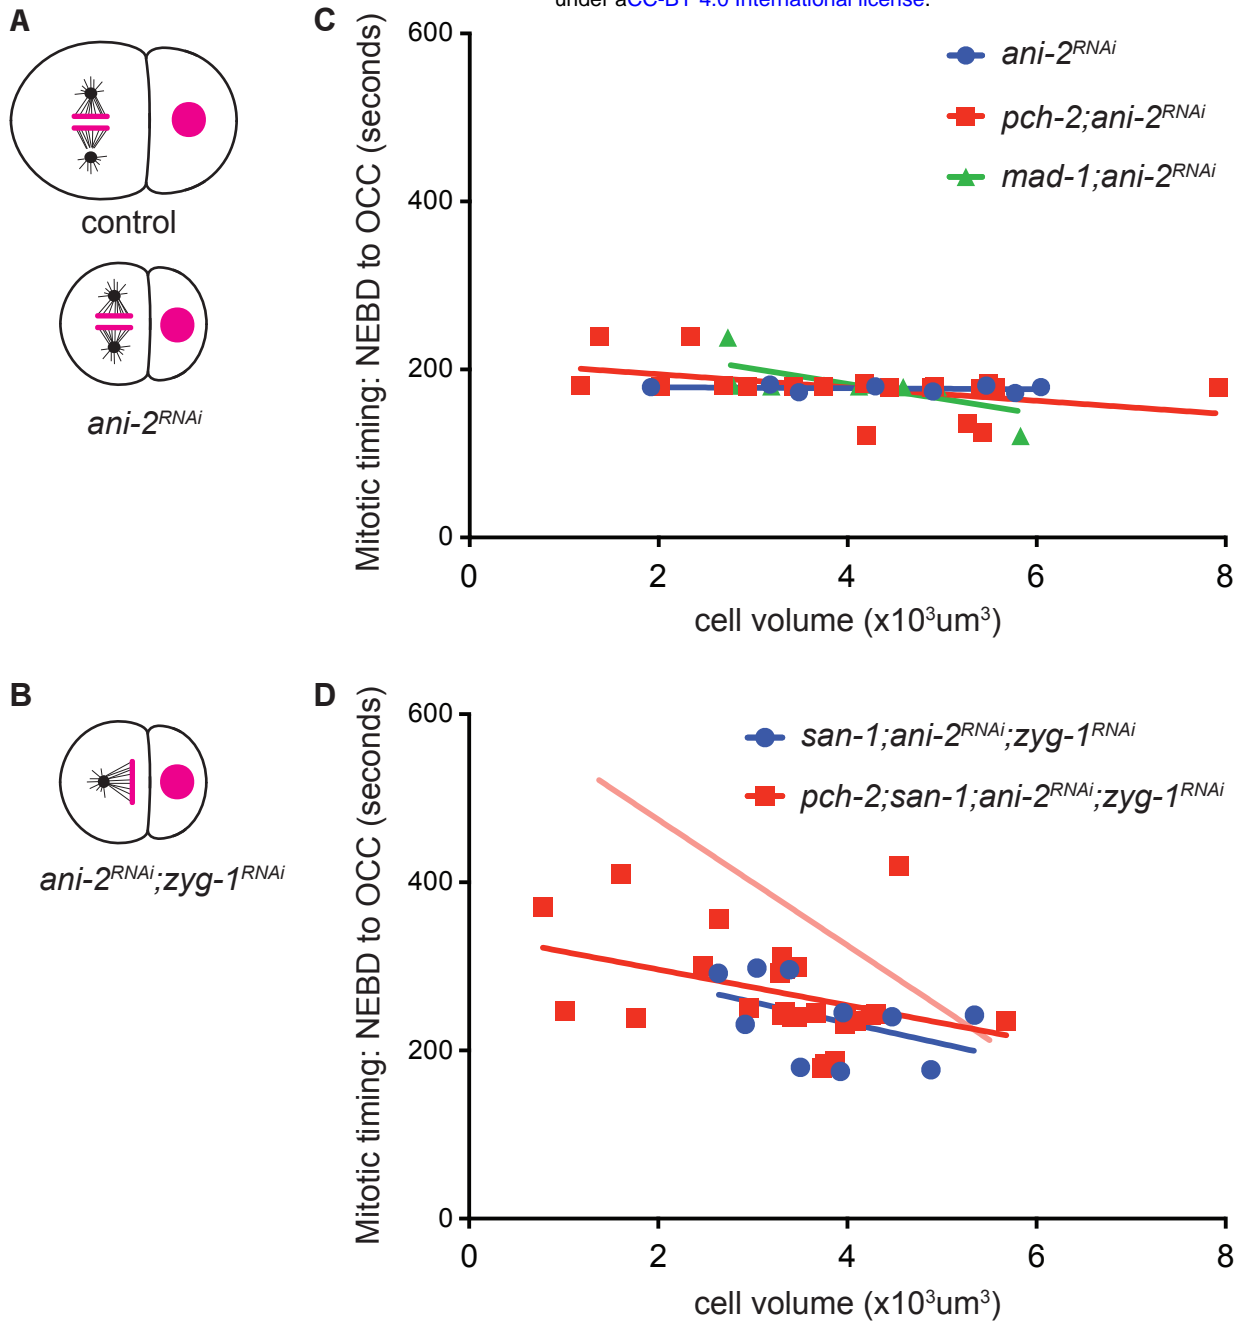

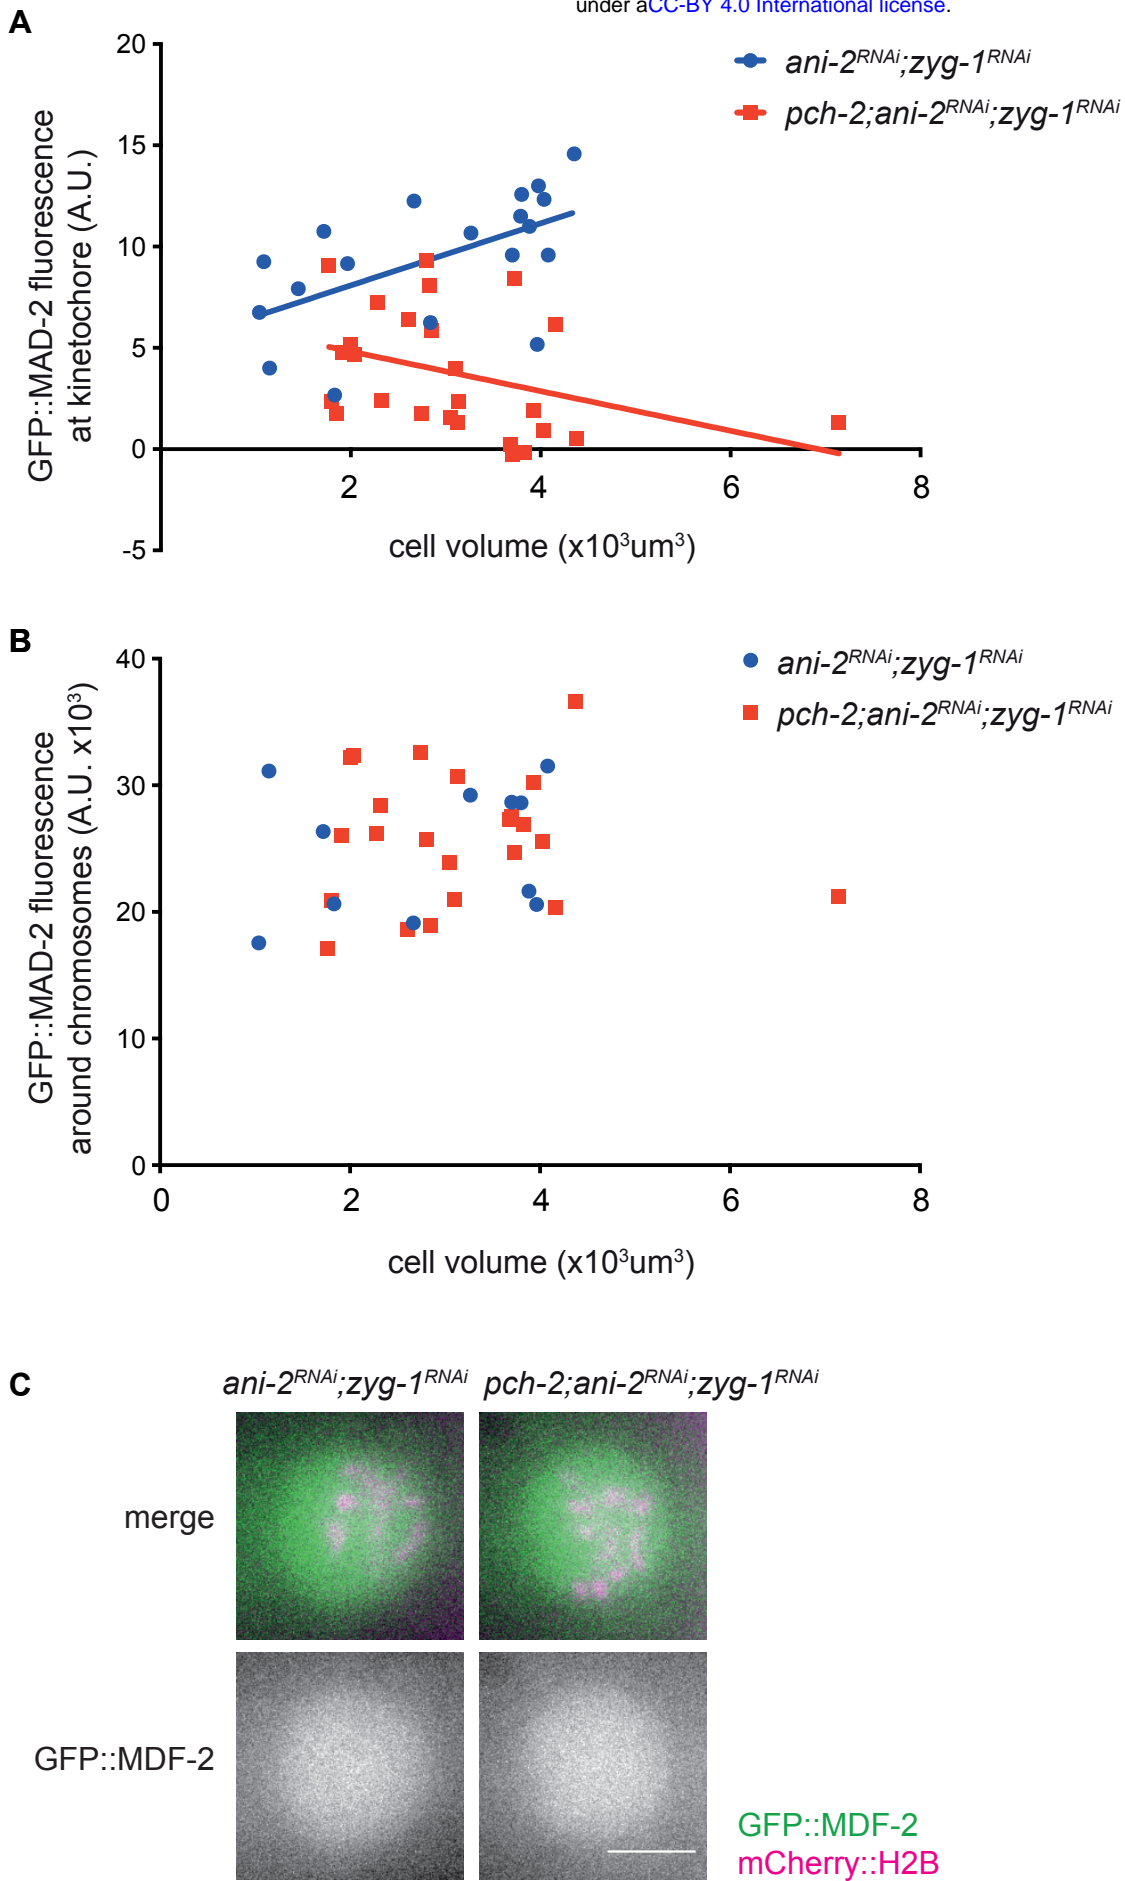

**A**

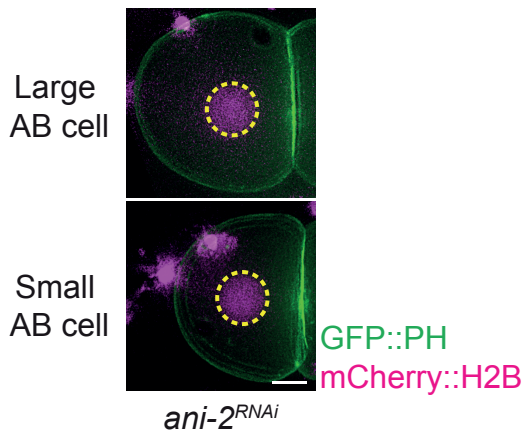

**B**

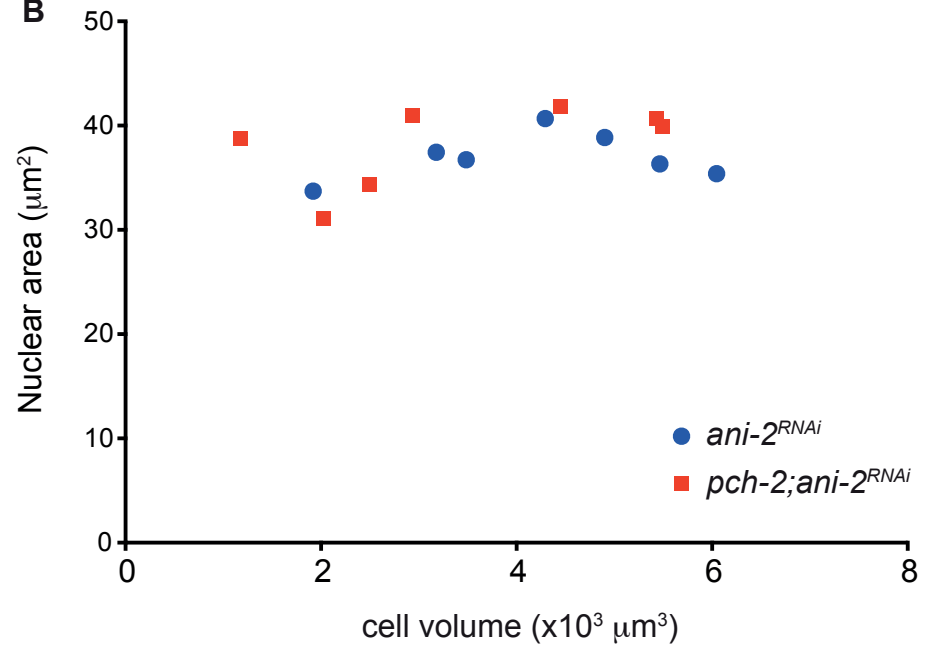

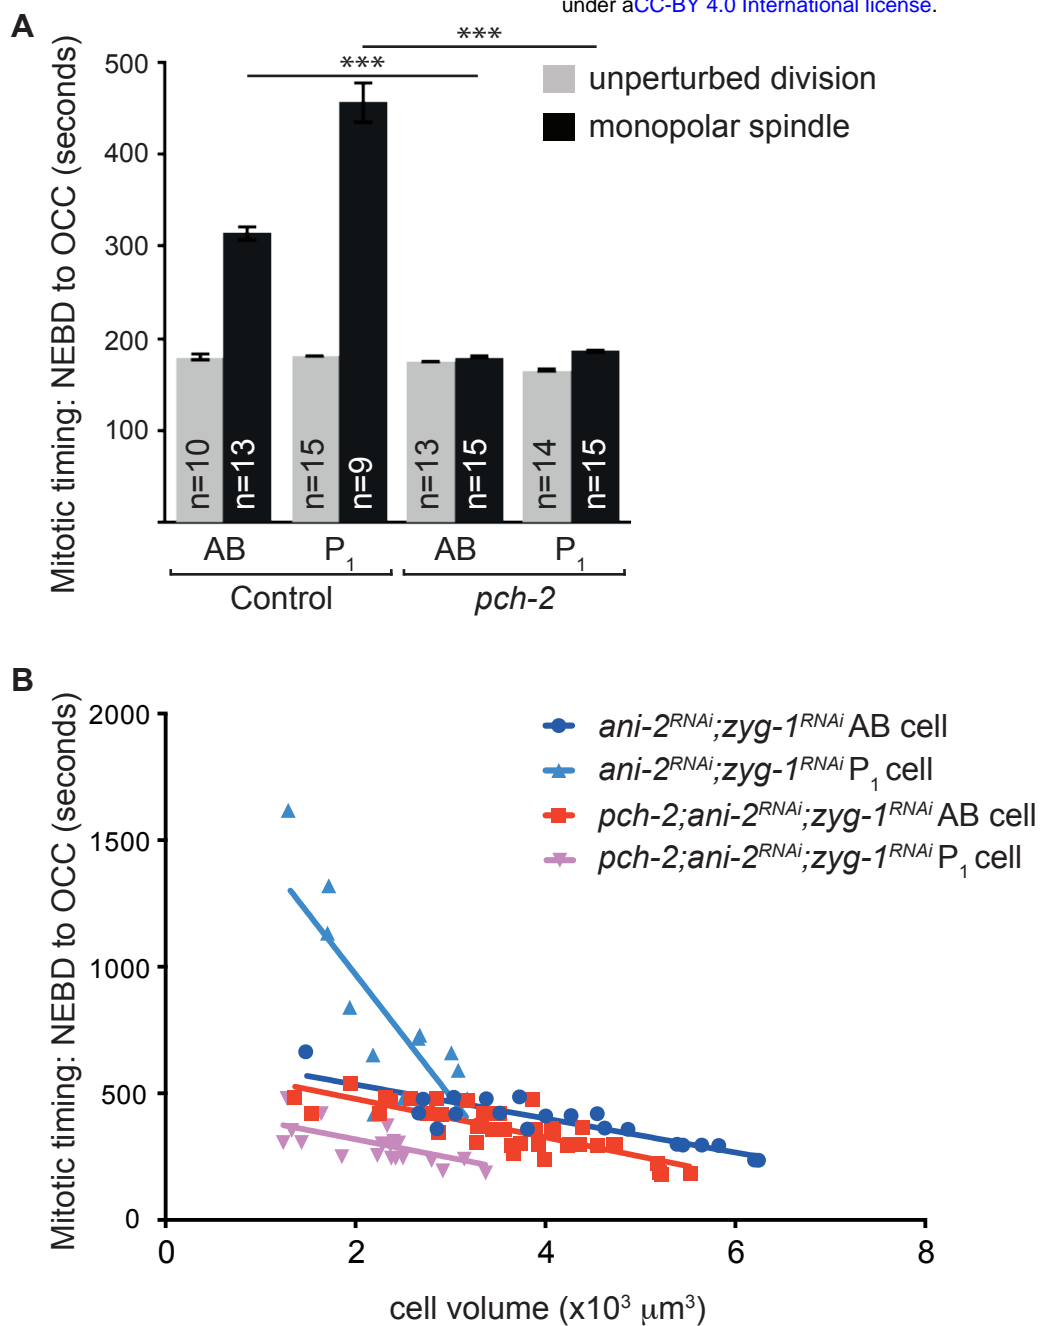

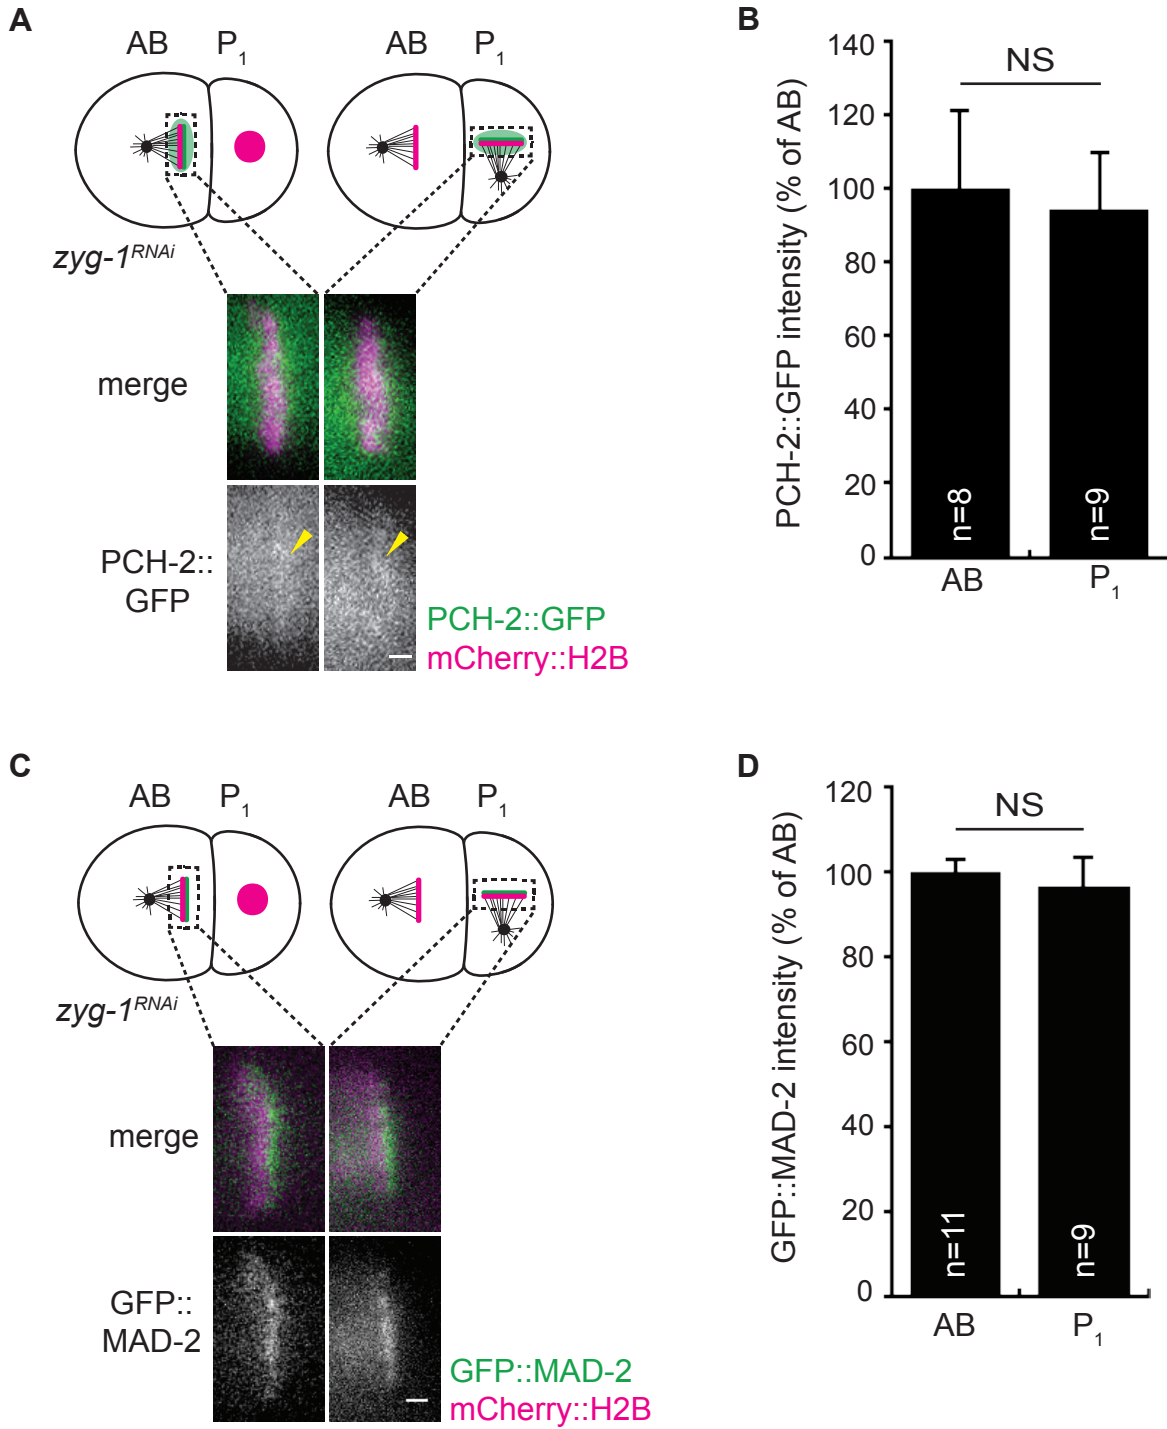



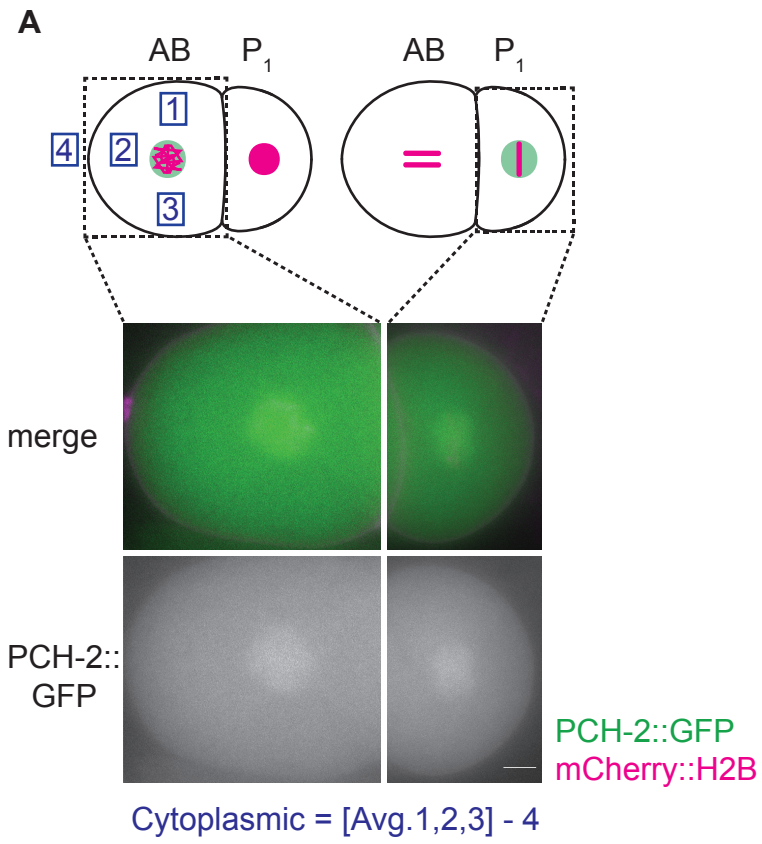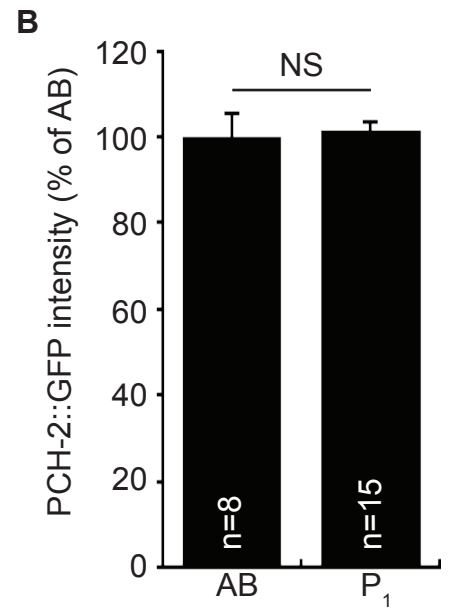

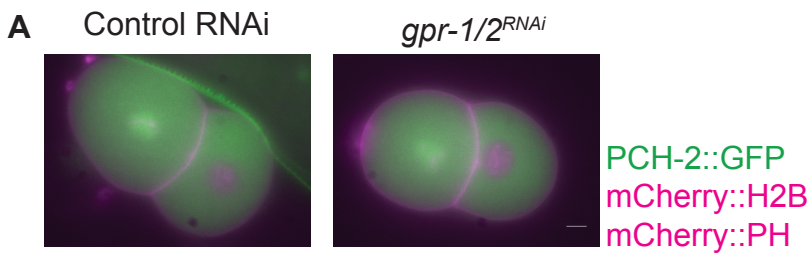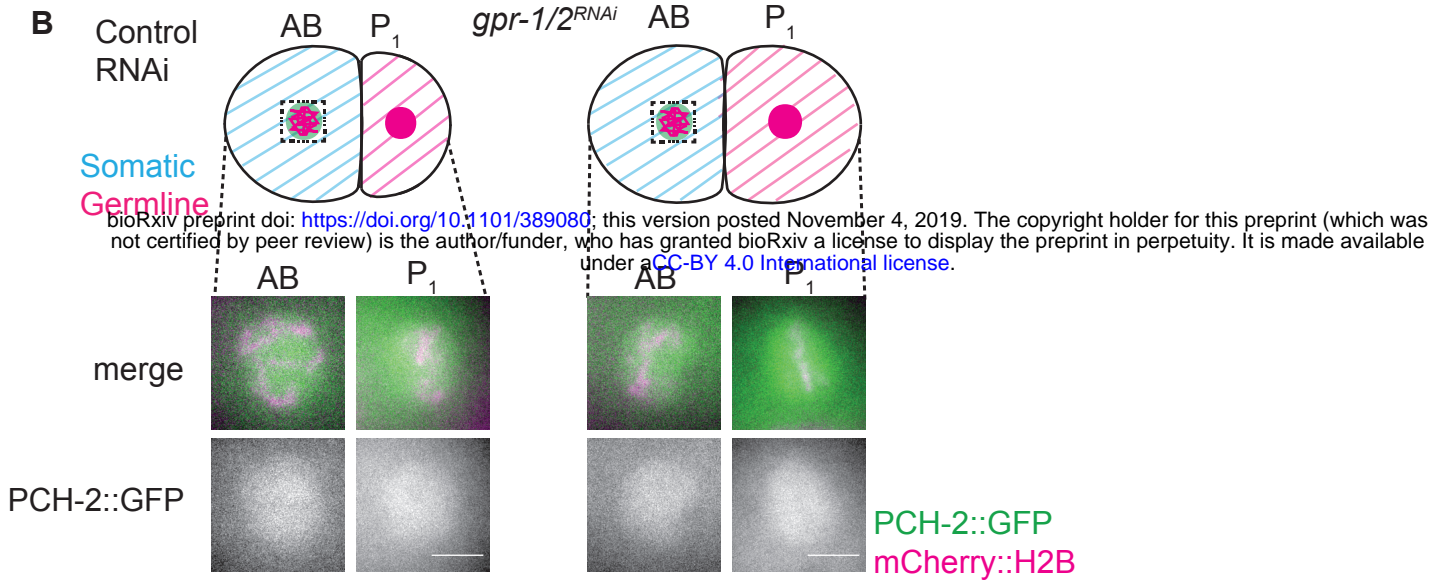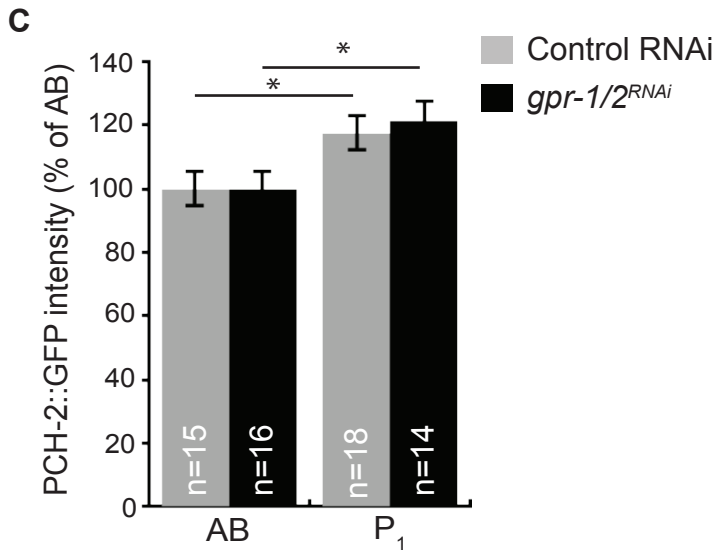

**Table S1: Strains used in this study**

| Strain | Genotype                                                                                                                                                                                                           |
|--------|--------------------------------------------------------------------------------------------------------------------------------------------------------------------------------------------------------------------|
| OD56   | <i>unc-119(ed3) III; ItIs37 [pAA64; Ppie-1::mCherry::his-58; unc-119 (+)] IV</i>                                                                                                                                   |
| OD95   | <i>unc-119(ed3) III; ItIs37 [pAA64; Ppie-1::mCherry::his-58; unc-119 (+)] IV; ItIs38 [pAA1; Ppie-1::GFP::PH(PLC1delta1); unc-119(+)]</i>                                                                           |
| BHL575 | <i>pch-2(tm1458) II; unc-119(ed3) III; ItIs37 [pAA64; Ppie-1::mCherry::his-58; unc-119 (+)] IV; ItIs38 [pAA1; Ppie-1::GFP::PH(PLC1delta1); unc-119(+)]</i>                                                         |
| BHL596 | <i>unc-119(ed3) III; ItIs37 [pAA64; Ppie-1::mCherry::his-58; unc-119 (+)] IV; ItIs38 [pAA1; Ppie-1::GFP::PH(PLC1delta1); unc-119(+)]; mdf-1(av19) V</i>                                                            |
| BHL600 | <i>unc-119(ed3) III; ItIs37 [pAA64; Ppie-1::mCherry::his-58; unc-119 (+)] IV; ItIs52 [pOD379; Ppie-1::GFP::MDF-2; unc-119 (+)]</i>                                                                                 |
| BHL604 | <i>pch-2(tm1458) II; unc-119(ed3) III; ItIs37 [pAA64; Ppie-1::mCherry::his-58; unc-119 (+)] IV; ItIs52 [pOD379; Ppie-1::GFP::MDF-2; unc-119 (+)]</i>                                                               |
| BHL608 | <i>cmt-1(ok2879) I; unc-119(ed3) III; ItIs37 [pAA64; Ppie-1::mCherry::his-58; unc-119 (+)] IV; ItIs38 [pAA1; Ppie-1::GFP::PH(PLC1delta1); unc-119(+)]</i>                                                          |
| BHL664 | <i>Ppch-2::pch-2::GFP-3XFLAG (blt4 [pCN94]) II; unc-119(ed3) III; ItIs37 [pAA64; Ppie-1::mCherry::his-58; unc-119 (+)] IV</i>                                                                                      |
| BHL666 | <i>unc-119(ed3) III; ItIs37 [pAA64; Ppie-1::mCherry::his-58; unc-119 (+)]; mdf-2(tm2190) IV/nT1[qIs51]( IV;V) ItIs38 [pAA1; Ppie-1::GFP::PH(PLC1delta1); unc-119(+)]</i>                                           |
| BHL883 | <i>san-1/mdf-3 (ok1580) I; pch-2(tm1458) II; unc-119(ed3) III; ItIs37 [pAA64; Ppie-1::mCherry::his-58; unc-119 (+)] IV; ItIs38 [pAA1; Ppie-1::GFP::PH(PLC1delta1); unc-119(+)]</i>                                 |
| BHL887 | <i>cmt-1(ok2879) I; pch-2::GFP-3XFLAG (blt4 [pCN94]) II; unc-119(ed3) III; ItIs44[pAA173; pPie-1::mCherry::PH(PLC1delta1); unc-119(+)]; ItIs37 [pAA64; Ppie-1::mCherry::his-58; unc-119 (+)] IV</i>                |
| BHL888 | <i>unc-119(ed3) III; ItIs44 [pAA173; pPie-1::mCherry::PH(PLC1delta1); unc-119(+)]; ItIs52 [pOD379; Ppie-1::GFP::mdf-2; unc-119 (+)]; ItIs37 [pAA64; Ppie-1::mCherry::his-58; unc-119 (+)] IV</i>                   |
| BHL889 | <i>pch-2(tm1458) II; unc-119(ed3) III; ItIs44 [pAA173; pPie-1::mCherry::PH(PLC1delta1); unc-119(+)]; ItIs52 [pOD379; Ppie-1::GFP::mdf-2; unc-119 (+)]; ItIs37 [pAA64; Ppie-1::mCherry::his-58; unc-119 (+)] IV</i> |
| BHL891 | <i>unc-119(ed3) III; ItIs37 [pAA64; Ppie-1::mCherry::his-58; unc-119 (+)] IV; ItIs24[pAZ132; pPie-1::GFP::tba-2; unc-119(+)]</i>                                                                                   |
| BHL892 | <i>pch-2 (tm1458) II; unc-119(ed3) III; ItIs37 [pAA64; Ppie-1::mCherry::his-58; unc-119 (+)] IV; ItIs24 [pAZ132; pPie-1::GFP::tba-2; unc-119(+)]</i>                                                               |
| BHL893 | <i>san-1/mdf-3 (ok1580) I; unc-119(ed3) III; ItIs37 [pAA64; Ppie-1::mCherry::his-58; unc-119 (+)] IV; ItIs38 [pAA1; Ppie-1::GFP::PH(PLC1delta1); unc-119(+)]</i>                                                   |
| BHL904 | <i>Ppch-2::pch-2::GFP-3XFLAG (blt4 [pCN94]) II; unc-119(ed3) III; ItIs44[pAA173; pPie-1::mCherry::PH(PLC1delta1); unc-119(+)]; ItIs37 [pAA64; Ppie-1::mCherry::his-58; unc-119 (+)] IV</i>                         |
| BHL950 | <i>pch-2(tm1458) II; unc-119(ed3) III; ItIs37 [pAA64; Ppie-1::mCherry::his-58; unc-119 (+)]; mdf-2(tm2190) IV/nT1[qIs51]( IV;V); ItIs38 [pAA1; Ppie-1::GFP::PH(PLC1delta1); unc-119(+)]</i>                        |

|        |                                                                                                                                                                             |
|--------|-----------------------------------------------------------------------------------------------------------------------------------------------------------------------------|
| BHL958 | <i>unc-119(ed3) III; ItIs37 [pAA64; Ppie-1::mCherry::his-58; unc-119 (+)] IV/nT1[qIs51]( IV;V); ItIs38 [pAA1; Ppie-1::GFP::PH(PLC1delta1); unc-119(+)]</i>                  |
| BHL964 | <i>zyg-1(or297) unc-4(e120) II unc-119(ed3) III; ItIs37 [pAA64; Ppie-1::mCherry::his-58; unc-119 (+)] IV; ItIs24[pAZ132; pPie-1::GFP::tba-2; unc-119(+)]</i>                |
| BHL965 | <i>zyg-1(or297) pch-2(tm1458) unc-4(e120) II; unc-119(ed3) III; ItIs37 [pAA64; Ppie-1::mCherry::his-58; unc-119 (+)] IV; ItIs24[pAZ132; pPie-1::GFP::tba-2; unc-119(+)]</i> |
| GAL5   | <i>san-1/mdf-3 (mat5) I; unc-119(ed3) III; ruls57[Ppie-1::GFP::tubulin + unc-119(+)]; ItIs37[pie-1p::mCherry::his-58 (pAA64) + unc-119(+)] IV</i>                           |
